# Supplementary material
Source: PubMed Central journal article supplement (PMC8406433)
Supplement: NIHMS1634551-supplement-Supplementary_Table_3.pdf [file NIHMS1634551-supplement-Supplementary_Table_3.pdf]

|    | A                                           | B     | C   | D           | E         | F          | G    | H                 | I                | J               | K             | L            | M                          | N                     | O                         | P                           | Q                      | R                                                |
|----|---------------------------------------------|-------|-----|-------------|-----------|------------|------|-------------------|------------------|-----------------|---------------|--------------|----------------------------|-----------------------|---------------------------|-----------------------------|------------------------|--------------------------------------------------|
| 1  | <b>Table S3: HBV DNA Integration Sites*</b> |       |     |             |           |            |      |                   |                  |                 |               |              |                            |                       |                           |                             |                        |                                                  |
| 2  | patient number                              | Group | Age | sequence no | clone no. | Clone size | Chrm | Chrm insert sites | gene symbol      | insert lccation | Gene polarity | gene to left | distance to left hand gene | gene to left polarity | gene to right             | distance to right hand gene | gene to right polarity | cell junction sequence (lower to higher sense)   |
| 3  | 1                                           | 1     | 15  | 4042        | 253       | 2035       | X    | 89717084          |                  |                 |               | CPXCR1       | -962300                    | +                     | TGIF2LX                   | 204856                      | +                      | AGCCATATTTCTGTTCTT--HBV                          |
| 4  | 1                                           | 1     | 15  | 4050        |           |            | 3    | 150124112         |                  |                 |               | TMEM18<br>3B | -140746                    | -                     | LINC0121<br>3             | 114406                      | +                      | GCCAGCAGGAGCTTTGCT--HBV                          |
| 5  | 1                                           | 1     | 15  | 3209        | 185       | 23         | 12   | 102998812         |                  |                 |               | ASCL1        | -38296                     | +                     | C12orf42                  | 238778                      | -                      | AAAATGTAACAAGAGTC--HBV                           |
| 6  | 1                                           | 1     | 15  | 3186        | 182       | 282        | 22   | 20814502          | PI4KA            | intron          | -             |              |                            |                       |                           |                             |                        | HBV--AGTTTTCGAAGGCTGAGG                          |
| 7  | 1                                           | 1     | 15  | 3183        | 184       | 78         | 1    | 155314931         | FDPS             | intron          | +             |              |                            |                       |                           |                             |                        | TGGTGGTGGCTGAAACAAGATTG<br>TC-HBV                |
| 8  | 1                                           | 1     | 15  | 3203        | 181       | 165        | 2    | 196661734         | CCDC15<br>0      | intron          | +             |              |                            |                       |                           |                             |                        | HBV--ATTGCCCTTAATAGTACTT                         |
| 9  | 1                                           | 1     | 15  | 3202        | 183       | 165        | 4    | 6942259           | TBC1D1<br>4      | intron          | +             |              |                            |                       |                           |                             |                        | ACTGAATTATTTTCATGCCTTC--<br>HBV                  |
| 10 | 1                                           | 1     | 15  | 3188        |           |            | 7    | 156990872         |                  |                 |               | NOM1         | -17690                     | +                     | MXN1                      | 13980                       | -                      | HBV--<br>nnGACTGTGTCTATCATTGGG                   |
| 11 | 1                                           | 1     | 15  | 3191        |           |            | 6    | 142418190         | ADGRG<br>6       | intron          | +             |              |                            |                       |                           |                             |                        | TAATCCCAGCTACTACTCn--HBV                         |
| 12 | 1                                           | 1     | 15  | 3199        |           |            | 13   | 43244958          | ENOX1            | intron          | -             |              |                            |                       |                           |                             |                        | within 130 nts to right if 43244958<br>HBV--     |
| 13 | 1                                           | 1     | 15  | 3208        |           |            | 6    | 114662146         |                  |                 |               | HS3ST5       | -599269                    | -                     | >1000000                  |                             |                        | GGTGGTTTAAGCAAATAAAT                             |
| 14 | 1                                           | 1     | 15  | 3334        | 190       | 103        | 19   | 45113949          | PPP1R3<br>7      | intron          | +             |              |                            |                       |                           |                             |                        | HBV--TGGCTCTGCTTCTCTTT                           |
| 15 | 1                                           | 1     | 15  | 3337        | 188       | 732        | 2    | 187112119         |                  |                 |               | ZSWIM2       | -262949                    | -                     | CALCRL                    | 229843                      | -                      | GCAGTTATGTATATGTTTCT--HBV                        |
| 16 | 1                                           | 1     | 15  | 3368        | 189       | 1078       |      | 0                 |                  |                 |               |              |                            |                       |                           |                             |                        |                                                  |
| 17 | 1                                           | 1     | 15  | 3339        | 187       | 571        | 1    | 12184317          | TNFRSF<br>1B     | intron          | +             |              |                            |                       |                           |                             |                        | HBV--TCATTGTTTAGCCATGAC<br>HBV--                 |
| 18 | 1                                           | 1     | 15  | 3338        | 186       | 1223       | 15   | 44884789          |                  |                 |               | TRIM69       | -117017                    | +                     | C15orf43<br>LINC0098<br>2 | 71903<br>88845              | +                      | AAAAAAGGAAAAAAACTC<br>ATTTGGAGT                  |
| 19 | 2                                           | 1     | 17  | 3296        | 206       | 20         | 1    | 2970771           |                  |                 |               | TTC34        | -181180                    | -                     |                           |                             |                        | GCTGATAACAGCCGGGC--HBV                           |
| 20 | 2                                           | 1     | 17  | 3291        | 205       | 102        | 4    | 84240667          | LOC101<br>928978 | intron          |               |              |                            |                       |                           |                             |                        | HBV--nCCAAACATATAATTGGGAT                        |
| 21 | 2                                           | 1     | 17  | 3274        | 204       | 275        | 1    | 84772117          |                  |                 |               | SSX2IP       | -81560                     | -                     | LPAR3                     | 41285                       | -                      | CCCGTGTATCATCTAAGAGG--<br>HBV                    |
| 22 | 2                                           | 1     | 17  | 3260        |           |            |      | 0                 |                  |                 |               |              |                            |                       |                           |                             |                        |                                                  |
| 23 | 2                                           | 1     | 17  | 3264        |           |            | X    | 97542265          | DIAPH2-<br>AS1   | intron          | -             |              |                            |                       |                           |                             |                        | AGTCAGAAAGTCTTCnnnnnnnnnn<br>nnnnnnnnnnnnnn--HBV |
| 24 | 2                                           | 1     | 17  | 3272        |           |            |      | 0                 |                  |                 |               |              |                            |                       |                           |                             |                        |                                                  |
| 25 | 2                                           | 1     | 17  | 3276        |           |            | 12   | 99976747          | ANKS1B           | intron          | -             |              |                            |                       |                           |                             |                        | TTAATAAGAAACATGAT--HBV                           |
| 26 | 2                                           | 1     | 17  | 3278        |           |            | 4    | 176197346         |                  |                 |               | SPATA4       | -1675                      | -                     | ASB5                      | 16328                       | -                      | TAAAGGGAAAAGTCAAAGTgnnnn<br>nn--HBV              |
| 27 | 2                                           | 1     | 17  | 3283        |           |            | 3    | 147148414         |                  |                 |               | PLSCR5       | -542198                    | -                     | ZIC4                      | 237633                      | -                      | GGCACATAGACCAATGGAA--HBV                         |
| 28 | 2                                           | 1     | 17  | 3290        |           |            |      | 0                 |                  |                 |               |              |                            |                       |                           |                             |                        |                                                  |
| 29 | 2                                           | 1     | 17  | 3303        | 200       | 176        | 5    | 45712223          |                  |                 |               | HCN1         | -16105                     | -                     | >1000000                  |                             |                        | HBV--TGAATAATATGCTTGC                            |



|    | A | B | C  | D    | E   | F    | G  | H         | I                | J                           | K | L                | M       | N | O                | P      | Q | R                                                                |
|----|---|---|----|------|-----|------|----|-----------|------------------|-----------------------------|---|------------------|---------|---|------------------|--------|---|------------------------------------------------------------------|
| 64 | 3 | 1 | 18 | 3828 |     |      | 11 | 77870013  | AAMDC            | intron                      | + |                  |         |   |                  |        |   | TACCTAACCC<br>TGAGACA Gnnnnnnnnnnn--HBV                          |
| 65 | 3 | 1 | 18 | 3826 |     |      | X  | 47283158  |                  |                             |   | USP11            | -34830  | + | ZNF157           | 87441  | + | HBV--TTTCTGCACATTTGTGTCA                                         |
| 66 | 3 | 1 | 18 | 3780 | 223 | 3024 |    | 0         |                  |                             |   |                  |         |   |                  |        |   |                                                                  |
| 67 | 3 | 1 | 18 | 3914 | 225 | 34   | 20 | 56183987  |                  |                             |   | CBLN4            | -178515 | - | MC3R             | 64744  | + | HBV-CAATTACCCAGTCTTA                                             |
| 68 | 3 | 1 | 18 | 3933 | 224 | 61   | 14 | 76815170  |                  |                             |   | ANGEL1           | -2230   | - | LRRRC74A         | 11211  | + | HBV--GTATAAACTCTCAATG                                            |
| 69 | 3 | 1 | 18 | 3940 | 226 | 286  |    | 0         |                  |                             |   |                  |         |   |                  |        |   |                                                                  |
| 70 | 3 | 1 | 18 | 3913 |     |      | 12 | 43966271  | TMEM11<br>7      | intron                      | + |                  |         |   |                  |        |   | AAGAAGGGGATAAGAGn--HBV                                           |
| 71 | 3 | 1 | 18 | 3938 |     |      | 3  | 192177304 | FGF12            | intron                      | - |                  |         |   |                  |        |   | HBV--AGGCCTATAAAATTAT                                            |
| 72 | 3 | 1 | 18 | 3944 |     |      | 13 | 58018244  |                  |                             |   | PCDH17           | -289313 | + | LOC1019<br>26897 | 147582 |   | HBV--TGGTGACACATACCTGTAGT<br>CTTGCTGACTGCACATATCACATG<br>nn--HBV |
| 73 | 4 | 1 | 18 | 3572 | 218 | 433  | 22 | 17962139  | MICAL3           | intron                      | - |                  |         |   |                  |        |   | HBV--GATAACCGACATATAC                                            |
| 74 | 4 | 1 | 18 | 3592 | 219 | 193  | 5  | 59451480  | PDE4D            | intron                      | - |                  |         |   |                  |        |   |                                                                  |
| 75 | 4 | 1 | 18 | 3567 | 217 | 611  | 2  | 233776390 | MROH2<br>A       | intron                      | + |                  |         |   |                  |        |   | HBV--CTGTTGCCAGGCTGGA                                            |
| 76 | 4 | 1 | 18 | 3566 |     |      | 11 | 17429330  | ABCC8            | intron                      | - |                  |         |   |                  |        |   | HBV--ATCCACCCTCAAGGCAA                                           |
| 77 | 4 | 1 | 18 | 3583 |     |      | 1  | 18438305  |                  |                             |   | IGSF21           | -59822  | + | KLHDC7A          | 42624  | + | HBV--<br>GGGCTCAAATCCCTGTTACACGC                                 |
| 78 | 4 | 1 | 18 | 3584 |     |      | 16 | 12584020  |                  |                             |   | SNX29            | -9731   | + | CPPED1           | 75778  | - | HBV--<br>nCTAAGTGTCCTCTGTGGT                                     |
| 79 | 4 | 1 | 18 | 3586 |     |      | 1  | 86733852  | SH3GLB<br>1      | intron                      | + |                  |         |   |                  |        |   | CTGTGGTGGGAGTATTATA--HBV                                         |
| 80 | 4 | 1 | 18 | 3588 |     |      | 2  | 82108916  |                  |                             |   | LOC1005<br>07201 | -641970 | - | LOC1720          | 747886 | + | HBV--AATTCTATTGGATTACCC                                          |
| 81 | 4 | 1 | 18 | 3394 | 194 | 103  |    | 0         |                  |                             |   |                  |         |   |                  |        |   |                                                                  |
| 82 | 4 | 1 | 18 | 3385 | 191 | 102  | 10 | 53190646  |                  |                             |   | MBL2             | -418946 | - | PCDH15           | 612124 | - | TTTCAAAAATTAATTTTTTA--HBV                                        |
| 83 | 4 | 1 | 18 | 3397 | 192 | 433  | 9  | 92115984  |                  |                             |   | SPTLC1           | -510    | - | LOC1001<br>28076 | 16849  | + | within 40 nts to left of 92115984                                |
| 84 | 4 | 1 | 18 | 3383 |     |      |    | 0         |                  |                             |   |                  |         |   |                  |        |   |                                                                  |
| 85 | 4 | 1 | 18 | 3388 |     |      | 21 | 30829731  | KRTAP7-<br>1     | at<br>beginnin<br>g of exon | - |                  |         |   |                  |        |   | HBV--<br>TGTGAAGGGTAAGTTACCCA                                    |
| 86 | 4 | 1 | 18 | 3389 |     |      | 2  | 225661861 |                  |                             |   | NYAP2            | -7843   | + | LOC6467<br>36    | 480932 | + | HBV--TTACAGACATGCACCAC                                           |
| 87 | 4 | 1 | 18 | 3391 |     |      |    | 0         |                  |                             |   |                  |         |   |                  |        |   |                                                                  |
| 88 | 4 | 1 | 18 | 3401 |     |      |    | 0         |                  |                             |   |                  |         |   |                  |        |   |                                                                  |
| 89 | 4 | 1 | 18 | 3403 |     |      | 7  | 34592630  | NPSR1-<br>AS1    | intron                      | - |                  |         |   |                  |        |   | within 40 nts to right of nt 34592630                            |
| 90 | 4 | 1 | 18 | 3406 |     |      | 5  | 80192447  | SERINC<br>5      | intron                      | - |                  |         |   |                  |        |   | within 200 nts to right of nt<br>80192447                        |
| 91 | 4 | 1 | 18 | 3408 |     |      | 8  | 37724134  | LOC101<br>929622 | intron                      | + |                  |         |   |                  |        |   | HBV--<br>ACTCCAGCCCTCTCTGAGC                                     |
| 92 | 4 | 1 | 18 | 3409 |     |      |    | 0         |                  |                             |   |                  |         |   |                  |        |   |                                                                  |
| 93 | 4 | 1 | 18 | 3410 |     |      | X  | 42702365  |                  |                             |   | CASK             | -779331 | - | PPP1R2P<br>9     | 75000  | - | GCTTTCTATATGTTGATGACTn--<br>HBV                                  |
| 94 | 4 | 1 | 18 | 3381 |     |      | 15 | 76549357  | SCAPER           | intron                      | - |                  |         |   |                  |        |   | HBV--CAAATGTCCAACAAT                                             |
| 95 | 4 | 1 | 18 | 3414 | 196 | 103  | 6  | 101585725 | GRIK2            | intron                      | + |                  |         |   |                  |        |   | GGAAAAAGGTGACACAT--HBV                                           |



|     | A | B | C  | D    | E   | F    | G  | H         | I                       | J      | K | L                       | M       | N | O                | P       | Q | R                                                                                                                  |
|-----|---|---|----|------|-----|------|----|-----------|-------------------------|--------|---|-------------------------|---------|---|------------------|---------|---|--------------------------------------------------------------------------------------------------------------------|
| 132 | 5 | 1 | 22 | 3965 | 238 | 89   | 3  | 172866200 |                         |        |   | ECT2                    | -44726  | + | SPATA16          | 23156   | - | GCTTTTATAGTTGAGGCC--HBV<br>TACCTGGGTTTGAACACTGTTnn--<br>HBV                                                        |
| 133 | 5 | 1 | 22 | 3949 | 234 | 102  | 3  | 59285332  |                         |        |   | C3orf67                 | -543323 | - | FHIT             | 463977  | - |                                                                                                                    |
| 134 | 5 | 1 | 22 | 3952 | 237 | 32   | 7  | 34326405  |                         |        |   | BMPER                   | -170533 | + | NPSR1-<br>AS1    | 20106   | - | HBV--ATCCACAAAACACCTCC                                                                                             |
| 135 | 5 | 1 | 22 | 3960 | 236 | 165  | 16 | 13311889  |                         |        |   | SHISA9                  | -76479  | + | ERCC4            | -610142 | + | HBV--AAAATTAATGAACATAAAAT<br>HBV--<br>AGCCCTGCAGGATTTTACAACC                                                       |
| 136 | 5 | 1 | 22 | 3963 |     |      | 2  | 238285839 | PER2                    | intron | - |                         |         |   |                  |         |   |                                                                                                                    |
| 137 | 5 | 1 | 22 | 3967 |     |      |    | 0         |                         |        |   |                         |         |   |                  |         |   |                                                                                                                    |
| 138 | 5 | 1 | 22 | 3972 |     |      | 5  | 122419019 | SNCAIP<br>LOC400<br>867 | intron | + |                         |         |   |                  |         |   | within 30 nts to right of nt<br>122419019                                                                          |
| 139 | 5 | 1 | 22 | 3977 |     |      | 21 | 38923345  |                         | intron | - |                         |         |   |                  |         |   | TGTTTCTGAATTACATGTC--HBV<br>GTACCTCTCGCTTACACACAC--<br>HBV                                                         |
| 140 | 6 | 1 | 24 | 4330 | 240 | 89   | 19 | 7905028   | MAP2K7                  | intron | + |                         |         |   |                  |         |   |                                                                                                                    |
| 141 | 6 | 1 | 24 | 4316 | 241 | 103  | 2  | 6468883   |                         |        |   | LINC012<br>47           | -93461  | - | LINC0048<br>7    | 260284  | - | AAACAACACAGCATTCTCTAAA--<br>HBV<br>HBV--<br>CTGCCAAGGCTGGGCAGTCGTT<br>CGATTTCCCTTTGTATTTTATnnnnnn<br>nnnnnnnnn-HBV |
| 142 | 6 | 1 | 24 | 4332 | 240 | 368  | 9  | 36836065  | PAX5<br>RALGPS<br>1     | intron | - |                         |         |   |                  |         |   |                                                                                                                    |
| 143 | 6 | 1 | 24 | 4312 |     |      | 9  | 127214489 |                         | intron | + |                         |         |   |                  |         |   |                                                                                                                    |
| 144 | 6 | 1 | 24 | 4321 |     |      | 1  | 96939372  |                         |        |   | PTBP2                   | -124323 | + | DPYD             | 138371  | - | within 700 nts to left of nt 96939372                                                                              |
| 145 | 6 | 1 | 24 | 4322 |     |      | 1  | 70708693  | LOC101<br>927244        | intron | + |                         |         |   |                  |         |   | GTCAGACAAGTAATGACTGnnnnn<br>nnn--HBV                                                                               |
| 146 | 6 | 1 | 24 | 4325 |     |      | 4  | 178108873 |                         |        |   | LINC010<br>98           | -118123 | + | >1000000         |         |   | CTGATTTAATAATGTATATnnnnnnnn<br>nn--HBV                                                                             |
| 147 | 6 | 1 | 24 | 4327 |     |      | 2  | 117314398 |                         |        |   | >1000000<br>0           |         |   | DDX18            | 500280  | + | HBV--TAATTATAGCTTGTCTC                                                                                             |
| 148 | 6 | 1 | 24 | 4331 |     |      |    | 0         |                         |        |   |                         |         |   |                  |         |   |                                                                                                                    |
| 149 | 6 | 1 | 24 | 4265 | 244 | 34   | 4  | 177597656 |                         |        |   | AGA                     | -155153 | - | LINC0109<br>8    | 131100  | + | ACTTAGAAGCTTTACCTC--HBV<br>TGTTACTAGAGTCCCTnnnnnnnn<br>n--HBV                                                      |
| 150 | 6 | 1 | 24 | 4267 | 244 | 34   | 4  | 6436575   | PPP2R2<br>C             | intron | - |                         |         |   |                  |         |   |                                                                                                                    |
| 151 | 6 | 1 | 24 | 4282 | 244 | 23   | 18 | 35811667  |                         |        |   | GALNT1<br>LINC013<br>43 | -99833  | + | MIR187           | 93150   | - | TTTATGTCCAACAGAC--HBV<br>AAAAGAAAAAATAACTTAG--<br>HBV                                                              |
| 152 | 6 | 1 | 24 | 4299 | 243 | 281  | 1  | 38590990  |                         |        |   | >1000000<br>0           |         |   | RRAGC            | 260624  | - | TTTGGCCATTACAGTATCAGC--<br>HBV                                                                                     |
| 153 | 6 | 1 | 24 | 4286 | 242 | 1133 | 10 | 109779347 |                         |        |   |                         |         |   | XPNPEP1          | 85418   | - |                                                                                                                    |
| 154 | 6 | 1 | 24 | 4288 |     |      |    | 0         |                         |        |   |                         |         |   |                  |         |   |                                                                                                                    |
| 155 | 6 | 1 | 24 | 4291 |     |      | 3  | 197076755 | DLG1                    | intron | - |                         |         |   |                  |         |   | GTACAAAGGCCAGCCTAGCA--<br>HBV                                                                                      |
| 156 | 6 | 1 | 24 | 4293 |     |      | 10 | 37470521  |                         |        |   | LINC009<br>93           | -123493 | + | MTRNR2L<br>7     | 130916  | - | HBV--AGGCAGGAGAATCGCTTGA<br>TTTTTTGTGTTTTTAAAAAG C--<br>HBV                                                        |
| 157 | 6 | 1 | 24 | 4248 | 246 | 36   | 15 | 96814536  |                         |        |   | SPATA8                  | -28921  | + | LINC0092<br>3    | 928079  | - |                                                                                                                    |
| 158 | 6 | 1 | 24 | 4241 | 247 | 42   | 16 | 48633860  |                         |        |   | N4BP1                   | -23651  | - | CBLN1            | 645543  | - | HBV--TGGGTCCAGACCTTAAG<br>HBV--ATCGCACCCTGCACTCC                                                                   |
| 159 | 6 | 1 | 24 | 4239 | 245 | 381  | 1  | 225490526 | ENAH                    | intron | - |                         |         |   |                  |         |   |                                                                                                                    |
| 160 | 6 | 1 | 24 | 4237 |     |      | 2  | 137801750 |                         |        |   | THSD7B                  | -124033 | + | LOC1019<br>28273 | 77003   | - | TTGAGATGTTTTTCAGACT--HBV<br>TGTGTCTGTGTGACGAnnnn--<br>HBV                                                          |
| 161 | 6 | 1 | 24 | 4238 |     |      | 10 | 20246294  | PLXDC2                  | intron | + |                         |         |   |                  |         |   |                                                                                                                    |

|     | A | B | C  | D    | E   | F    | G  | H         | I             | J      | K | L                | M       | N | O             | P      | Q | R                                                    |
|-----|---|---|----|------|-----|------|----|-----------|---------------|--------|---|------------------|---------|---|---------------|--------|---|------------------------------------------------------|
| 162 | 6 | 1 | 24 | 4240 |     |      | X  | 42769983  |               |        |   | CASK             | -846949 | - | PPP1R2P<br>9  | 7382   | - | CACCTCCATAACATACTT--HBV                              |
| 163 | 6 | 1 | 24 | 4244 |     |      | 13 | 109667013 |               |        |   | MYO16            | -460177 | + | LINC0067<br>6 | 61260  | + | CCCCCGCGTACAGGCACCCC--<br>HBV                        |
| 164 | 6 | 1 | 24 | 4246 |     |      | 3  | 7363687   | GRM7          | intron | + |                  |         |   |               |        |   | GGTCTCATCCAAT--HBV                                   |
| 165 | 6 | 1 | 24 | 4257 |     |      |    | 0         |               |        |   |                  |         |   |               |        |   |                                                      |
| 166 | 6 | 1 | 24 | 4259 |     |      | 5  | 160337249 | CCNJL         | intron | - |                  |         |   |               |        |   | GGTCTTGAACCTCTGGGCTG--<br>HBV                        |
| 167 | 6 | 1 | 24 | 4262 |     |      | X  | 7273398   | STS           | intron | + |                  |         |   |               |        |   | HBV--CAAGTCATAGGACTGAAAA                             |
| 168 | 7 | 1 | 28 | 3092 | 173 | 1078 | 16 | 10557512  | EMP2          | intron | - |                  |         |   |               |        |   | HBV--nnAAAGTTTTTCTTGG                                |
| 169 | 7 | 1 | 28 | 3088 | 169 | 1149 | 1  | 49161242  | AGBL4         | intron | - |                  |         |   |               |        |   | HBV--<br>TCTGGAGCCGAGTACATGTTCC<br>T                 |
| 170 | 7 | 1 | 28 | 3093 | 168 | 2136 | X  | 2621766   | CD99P1        | intron | - |                  |         |   |               |        |   | HBV--TTATTGATTACTCATGTAC                             |
| 171 | 7 | 1 | 28 | 3104 | 172 | 3730 | 7  | 84597817  |               |        |   | LOC1019<br>27378 | -13499  | + | SEMA3D        | 397738 | - | HBV--ACTATTCCACAATAGCAAAAG                           |
| 172 | 7 | 1 | 28 | 3106 | 170 | 2919 | 1  | 28945637  | EPB41         | intron | + |                  |         |   |               |        |   | AGTGTTTAATATCTGTT--HBV                               |
| 173 | 7 | 1 | 28 | 3108 | 171 | 3583 | 4  | 60356734  |               |        |   | >100000<br>0     |         |   | MIR548A<br>G1 | 565884 | + | within 40 nts to left of nt 101626622                |
| 174 | 7 | 1 | 28 | 3085 |     |      | 1  | 101626622 |               |        |   | LINC013<br>07    | -249309 | + | OLFM3         | 175944 | - | ACACTGCTTCCTGCATCCCAGC--<br>HBV                      |
| 175 | 7 | 1 | 28 | 3087 |     |      | 9  | 133048728 | GTF3C5        | intron | + |                  |         |   |               |        |   | within 150 nt to left of nt 133048728                |
| 176 | 7 | 1 | 28 | 3089 |     |      | 4  | 141763033 |               |        |   | IL15             | -29046  | + | INPP4B        | 265748 | - | CTCACACCTGTAATCCTAGCn--<br>HBV                       |
| 177 | 7 | 1 | 28 | 3090 |     |      |    | 0         |               |        |   |                  |         |   |               |        |   |                                                      |
| 178 | 7 | 1 | 28 | 3094 |     |      | X  | 42098007  |               |        |   | CASK             | -174973 | - | PPP1R2P<br>9  | 679358 | - | HBV--<br>nnnnnnnnnnnnTAAACTCGGCC<br>AGTCCTAGTT       |
| 179 | 7 | 1 | 28 | 3096 |     |      | 22 | 41681252  | NHP2L1        | intron | - |                  |         |   |               |        |   | TCAAAATTTATTTTGTCTTA--<br>HBV                        |
| 180 | 7 | 1 | 28 | 3097 |     |      | 6  | 37762238  |               |        |   | MDGA1            | -64248  | - | ZFAND3        | 57292  | + | ATTTCTGAGATAGGACTTgnn--<br>HBV                       |
| 181 | 7 | 1 | 28 | 3098 |     |      | 2  | 58948077  | LINC011<br>22 | intron | + |                  |         |   |               |        |   | AAATTTGCAT CCACAACCATCATA--<br>HBV                   |
| 182 | 7 | 1 | 28 | 3103 |     |      | 9  | 83598638  |               |        |   | FRMD3            | -60205  | - | IDNK          | 24410  | + | GAGCCAGGGTCAGAGATGA--HBV                             |
| 183 | 7 | 1 | 28 | 3109 |     |      |    | 0         |               |        |   |                  |         |   |               |        |   |                                                      |
| 184 | 7 | 1 | 28 | 3115 |     |      | 4  | 137562796 |               |        |   | PCDH18           | -30298  | - | LINC0061<br>6 | 464626 | - | HBV--AATTCTCAATCATTTTCTTT<br>TTAATAATTGTTAATATA--HBV |
| 185 | 7 | 1 | 28 | 3490 | 212 | 458  | 12 | 45245364  | ANO6          | intron | - |                  |         |   |               |        |   | AGGACCAGCCTGGCCAACTTG--<br>HBV                       |
| 186 | 7 | 1 | 28 | 3468 | 211 | 488  | 3  | 50252682  | GNAI2         | intron | + |                  |         |   |               |        |   |                                                      |
| 187 | 7 | 1 | 28 | 3456 | 208 | 1741 | 11 | 2162764   |               |        |   | INS              | -1555   | - | TH            | 1164   | - | CTGAGCCATGCCACAGCnn--HBV                             |
| 188 | 7 | 1 | 28 | 3465 | 209 | 1910 | 20 | 34711080  | TP53INP<br>2  | exon   | + |                  |         |   |               |        |   | GCACCAAGGGAGTGTGCA--HBV                              |
| 189 | 7 | 1 | 28 | 3460 | 210 | 1826 |    | 0         |               |        |   |                  |         |   |               |        |   |                                                      |
| 190 | 7 | 1 | 28 | 3459 | 207 | 2763 | 4  | 24192173  |               |        |   | PPARGC<br>1A     | -302096 | - | MIR573        | 328018 | - | TGGGAAAAATGTTG--HBV                                  |
| 191 | 7 | 1 | 28 | 3469 |     |      | 2  | 240851310 |               |        |   | KIF1A            | -31002  | - | AGXT          | 17434  | + | GGTCCTCCTGCCACAT--HBV                                |
| 192 | 7 | 1 | 28 | 3473 |     |      | 13 | 33533086  | STARD1<br>3   | intron | - |                  |         |   |               |        |   | within 224 nts to right of nt<br>33533086            |

|     | A | B | C  | D    | E   | F    | G  | H         | I            | J      | K | L          | M       | N | O         | P      | Q | R                                        |
|-----|---|---|----|------|-----|------|----|-----------|--------------|--------|---|------------|---------|---|-----------|--------|---|------------------------------------------|
| 193 | 7 | 1 | 28 | 3474 |     |      | 7  | 81645681  | LOC100128317 | intron |   |            |         |   |           |        |   | within 246 nts to left of nt 81645681    |
| 194 | 7 | 1 | 28 | 3476 |     |      | 12 | 131196616 | LINC01257    | intron | + |            |         |   |           |        |   | ACAACGTTCACTTTTGTT--HBV                  |
| 195 | 7 | 1 | 28 | 3478 |     |      | 4  | 7378006   | SORCS2       | intron | + |            |         |   |           |        |   | HBV--TACCCCGATTTTCATGAAG                 |
| 196 | 7 | 1 | 28 | 3488 |     |      | 13 | 88267974  |              |        |   | LINC00397  | -457454 | - | LINC00433 | 272854 | + | HBV--AAAGAGCTTCAGCACAGCA                 |
| 197 | 7 | 1 | 28 | 3491 |     |      | 17 | 77440729  | SEPT9        | intron | + |            |         |   |           |        |   | GTCTGCACAGGTGCCATC--HBV                  |
| 198 | 7 | 1 | 28 | 3493 |     |      | 7  | 121815754 |              |        |   | FAM3C      | -419386 | - | PTPRZ1    | 57350  | + | HBV--ATTCTGAACATCACTAAT                  |
| 199 | 7 | 1 | 28 | 3118 | 176 | 282  | 7  | 138078614 | AKR1D1       | intron | + |            |         |   |           |        |   | HBV--CTCAAAGCTATATTCTC                   |
| 200 | 7 | 1 | 28 | 3124 | 177 | 282  | 4  | 73404654  | ALB          | intron | + |            |         |   |           |        |   | CTAAGGAAAGTGCAAAG--HBV                   |
| 201 | 7 | 1 | 28 | 3147 | 178 | 283  | 16 | 49649494  | ZNF423       | intron | - |            |         |   |           |        |   | TCAGCACATATTAGGAT--HBV                   |
| 202 | 7 | 1 | 28 | 3127 | 174 | 484  | 9  | 113373775 | HDHD3        | exon   | - |            |         |   |           |        |   | HBV--AATTATCCCCAACATGG                   |
| 203 | 7 | 1 | 28 | 3151 | 175 | 635  | 11 | 9570069   |              |        |   | ZNF143     | -41545  | + | WEE1      | 3611   | + | HBV--AAACAAAACATTGTTAAG                  |
| 204 | 7 | 1 | 28 | 3125 |     |      | 8  | 116876744 | RAD21-AS1    | exon   | + |            |         |   |           |        |   | HBV--nCAGCCATAAAAAAGAAAAA                |
| 205 | 7 | 1 | 28 | 3134 |     |      | 3  | 34918259  | LOC101928135 | intron | - |            |         |   |           |        |   | HBV--ATCCCAATAGGAAA                      |
| 206 | 7 | 1 | 28 | 3135 |     |      | 3  | 184416743 |              |        |   | CHRD       | -26908  | + | EPHB3     | 145055 | + | CAGGTGCGCCATAACT--HBV                    |
| 207 | 7 | 1 | 28 | 3137 |     |      |    | 0         |              |        |   |            |         |   |           |        |   |                                          |
| 208 | 7 | 1 | 28 | 3139 |     |      | 4  | 99319381  | ADH1B        | intron | - |            |         |   |           |        |   | within 65 nts to right of nt 99319381    |
| 209 | 7 | 1 | 28 | 3143 |     |      | X  | 25732927  |              |        |   | ARX        | -716979 | - | MAGEB18   | 405415 | + | AAACCATAATATACTTCT--HBV                  |
| 210 | 7 | 1 | 28 | 3145 |     |      | 7  | 151906852 |              |        |   | PRKAG2-AS1 | -27629  | + | GALNTL5   | 49526  | + | HBV--GGCCATTTTACAATATA                   |
| 211 | 7 | 1 | 28 | 3146 |     |      | 4  | 38669922  | KLF3         | intron | + |            |         |   |           |        |   | HBV--AAGATGTCCTCTTAA                     |
| 212 | 7 | 1 | 28 | 3148 |     |      |    | 0         |              |        |   |            |         |   |           |        |   |                                          |
| 213 | 7 | 1 | 28 | 3150 |     |      | 19 | 58353102  | A1BG         | exon   | - |            |         |   |           |        |   | HBV--GAGTCTCCAGGTGGGC                    |
| 214 | 8 | 1 | 30 | 2190 | 89  | 124  | 2  | 26707285  | KCNK3        | intron | + |            |         |   |           |        |   | CCCTGGAATGGAGTGCG--HBV                   |
| 215 | 8 | 1 | 30 | 2198 | 87  | 229  | 3  | 61826795  | PTPRG        | intron | + |            |         |   |           |        |   | HBV--TGATAGCCAAATATAAACGTTCT             |
| 216 | 8 | 1 | 30 | 2160 | 88  | 220  | 2  | 105319156 | TGFBRA P1    | intron | - |            |         |   |           |        |   | AAAAATAAAAAATCAACAn--HBV                 |
| 217 | 8 | 1 | 30 | 2164 |     |      |    | 0         |              |        |   |            |         |   |           |        |   |                                          |
| 218 | 8 | 1 | 30 | 2166 |     |      | 11 | 97872304  |              |        |   | >1000000   |         |   | >1000000  |        |   | GCTGGCTGAGCCAGCA--HBV                    |
| 219 | 8 | 1 | 30 | 2168 |     |      | 16 | 71569561  | TAT-AS1      | intron | - |            |         |   |           |        |   | HBV--TAACTCCTGCGCTCAAGTG                 |
| 220 | 8 | 1 | 30 | 2176 |     |      | 7  | 5495114   | FBXL18       | intron | - |            |         |   |           |        |   | HBV--AGGAAAAGGCTCCCACTGC                 |
| 221 | 8 | 1 | 30 | 2185 |     |      | 5  | 141370942 | PCDHG B3     | exon   | + |            |         |   |           |        |   | HBV--AGGAGAACCTGGATGGCAG                 |
| 222 | 8 | 1 | 30 | 2281 | 94  | 52   | 2  | 145043331 | TEX41        | intron | + |            |         |   |           |        |   | HBV--GAAGTATCCAAGATAACTTCT<br>TTTCTACAGG |
| 223 | 8 | 1 | 30 | 2301 | 93  | 37   | 6  | 26933909  | GUSBP2       | intron | - |            |         |   |           |        |   | TCTGAAGGTGnnnnn--HBV                     |
| 224 | 8 | 1 | 30 | 2300 | 91  | 320  |    | 0         |              |        |   |            |         |   |           |        |   |                                          |
| 225 | 8 | 1 | 30 | 2278 | 90  | 1416 | 2  | 48690599  | LHCGR        | intron | - |            |         |   |           |        |   | CGTAGTTCTCTGAATAAGTTCT--<br>HBV          |

|     | A | B | C  | D    | E   | F    | G  | H         | I             | J      | K | L                     | M       | N | O             | P      | Q | R                                          |
|-----|---|---|----|------|-----|------|----|-----------|---------------|--------|---|-----------------------|---------|---|---------------|--------|---|--------------------------------------------|
| 226 | 8 | 1 | 30 | 2283 |     |      | X  | 85244654  | ZNF711        | intron | + |                       |         |   |               |        |   | AACCTTTGGAATGCGCGAGGG--<br>HBV             |
| 227 | 8 | 1 | 30 | 2310 |     |      | 11 | 18736493  | PTPN5         | intron | - |                       |         |   |               |        |   | HBV--TTTATGTCTAAATCCTCA                    |
| 228 | 8 | 1 | 30 | 2376 | 99  | 51   | 6  | 29796259  | LOC554        | intron | + |                       |         |   |               |        |   | CCTTGCTAGAAAGAGGTCAT--<br>HBV              |
| 229 | 8 | 1 | 30 | 2372 | 97  | 141  |    | 0         | 223           |        |   |                       |         |   |               |        |   |                                            |
| 230 | 8 | 1 | 30 | 2385 | 96  | 456  | 2  | 235320752 |               |        |   | SH3BP4                | -265038 | + | AGAP1         | 173336 | + | HBV--AGAAGAGTAACCTCACGG                    |
| 231 | 8 | 1 | 30 | 2371 | 98  | 407  |    | 0         |               |        |   |                       |         |   |               |        |   |                                            |
| 232 | 8 | 1 | 30 | 2365 | 95  | 727  |    | 0         |               |        |   |                       |         |   |               |        |   |                                            |
| 233 | 8 | 1 | 30 | 2394 |     |      | 12 | 112612606 |               |        |   | PTPN11                | -102693 | + | MIR1302-<br>1 | 82427  | - | HBV--CCAGGCTGGAGTGCAATGA                   |
| 234 | 8 | 1 | 30 | 2401 |     |      | 9  | 69450228  | APBA1         | intron | - |                       |         |   |               |        |   | within 50 nts to right of 72065144         |
| 235 | 8 | 1 | 30 | 2403 |     |      | 2  | 105251384 |               |        |   | GPR45                 | -7917   | + | TGFBRAP<br>1  | 13005  | - | HBV--TTGTCTGAGATGTGGGGA                    |
| 236 | 8 | 1 | 30 | 2404 |     |      |    | 0         |               |        |   |                       |         |   |               |        |   |                                            |
| 237 | 9 | 1 | 39 | 3498 | 213 | 680  | X  | 127219938 |               |        |   | PRR32                 | -398153 | + | ACTRT1        | 831023 | - | HBV--CTACATGTTTCCTTTTT                     |
| 238 | 9 | 1 | 39 | 3497 | 215 | 1030 | 14 | 97905846  |               |        |   | LOC1001<br>29345      | -219188 | - | LINC0155<br>0 | 19763  | - | TTAGTGTCTCTGCCC--HBV                       |
| 239 | 9 | 1 | 39 | 3503 | 214 | 621  | 8  | 55581800  |               |        |   | XKR4                  | -55649  | + | TMEM68        | 156943 | - | within 40 nts to right of nt 55581800      |
| 240 | 9 | 1 | 39 | 3504 |     |      |    | 0         |               |        |   |                       |         |   |               |        |   |                                            |
| 241 | 9 | 1 | 39 | 3507 |     |      | 20 | 32473272  | NOL4L         | intron | - |                       |         |   |               |        |   | within 40 nts to right of nt 32473272      |
| 242 | 9 | 1 | 39 | 3514 |     |      | 12 | 70661649  | PTPRR         | intron | - |                       |         |   |               |        |   | HBV--<br>CCAAACCCAGCACGGGTGAGGG            |
| 243 | 9 | 1 | 39 | 3520 |     |      | 8  | 107067262 |               |        |   | ABRA                  | -297018 | - | ANGPT1        | 182219 | - | CAGGCAACAGGCAATA--HBV                      |
| 244 | 9 | 1 | 39 | 3522 |     |      | 17 | 69641717  | LINC014<br>83 | intron | + |                       |         |   |               |        |   | TTTGTTTAAGGGGAA--HBV                       |
| 245 | 9 | 1 | 39 | 3526 |     |      | 10 | 82316697  | NRG3          | intron | + |                       |         |   |               |        |   | HBV--TCTACTTCTAAAAAGGA                     |
| 246 | 9 | 1 | 39 | 3033 | 161 | 89   | 11 | 13471813  |               |        |   | BTBD10                | -8516   | - | PTH           | 20240  | - | HBV-<br>nACATTCTCTATGTGAAAGG               |
| 247 | 9 | 1 | 39 | 3035 | 162 | 89   | 5  | 65472122  | ADAMT<br>S6   | intron | - |                       |         |   |               |        |   | within 40 nts to left of nt 65472122       |
| 248 | 9 | 1 | 39 | 3037 | 163 | 89   | 2  | 214293678 | SPAG16        | intron | + |                       |         |   |               |        |   | HBV--GTGGAGCTCATGGTTTGCT                   |
| 249 | 9 | 1 | 39 | 3014 |     |      | X  | 103653329 |               |        |   | TCEAL1<br>CCDC17<br>9 | -22381  | + | MORF4L2       | 22168  | - | within 368 nts to right of nt<br>103653329 |
| 250 | 9 | 1 | 39 | 3019 |     |      | 11 | 23679528  |               |        |   |                       | -819102 | - | LUZP2         | 817441 | + | HBV--AAGAGGAGCTTTATTGAG                    |
| 251 | 9 | 1 | 39 | 3020 |     |      | 5  | 7013040   |               |        |   | MIR4278               | -185119 | - | MIR4454       | 256262 | - | HBV--CTTGATGATTAGTCAT                      |
| 252 | 9 | 1 | 39 | 3034 |     |      | 19 | 16397387  | EPS15L<br>1   | intron | - |                       |         |   |               |        |   | HBV--GCTGTTTGCTATTTTAC                     |
| 253 | 9 | 1 | 39 | 3040 |     |      | 15 | 83141577  | HDGFR<br>P3   | intron | - |                       |         |   |               |        |   | CTCCATGACTGACAGTTTTnnn--<br>HBV            |
| 254 | 9 | 1 | 39 | 3045 |     |      | 1  | 211474161 |               |        |   | LINC004<br>67         | -41626  | + | RD3           | 2360   | - | HBV--GATAGAGTAGTTGGGGACT                   |
| 255 | 9 | 1 | 39 | 3047 |     |      |    | 0         |               |        |   |                       |         |   |               |        |   |                                            |
| 256 | 9 | 1 | 39 | 3065 | 166 | 238  | 8  | 10720956  |               |        |   | C8orf74               | -20363  | + | SOX7          | 2811   | - | HBV--<br>CAACCCAGCACAAACAATGGAT            |
| 257 | 9 | 1 | 39 | 3055 | 164 | 1063 | 1  | 227011883 | CDC42B<br>PA  | intron | - |                       |         |   |               |        |   | within 40 nts to right of nt<br>227011883  |
| 258 | 9 | 1 | 39 | 3082 | 165 | 881  | 10 | 99810494  | ABCC2         | intron | + |                       |         |   |               |        |   | HBV-- AGTGTGTGGGATTGGGAA                   |



|     | A  | B | C  | D    | E   | F    | G  | H         | I              | J      | K | L              | M       | N | O            | P      | Q | R                                                       |
|-----|----|---|----|------|-----|------|----|-----------|----------------|--------|---|----------------|---------|---|--------------|--------|---|---------------------------------------------------------|
| 259 | 9  | 1 | 39 | 3068 |     |      | 2  | 217797054 |                |        |   | DIRC3          | -40461  | - | TNS1         | 2734   | - | HBV--<br>CTGTCTCGAAAGAAAAAAGAAA<br>A                    |
| 260 | 10 | 2 | 14 | 2541 | 109 | 52   | 9  | 108587789 |                |        |   | >100000<br>0   |         |   | ACTL7B       | 266799 | - | HBV--<br>TTTTTCTGAAATTCAGGTGAC                          |
| 261 | 10 | 2 | 14 | 2548 | 108 | 51   | 5  | 118860870 | DTWD2          | intron | - |                |         |   |              |        |   | HBV--TTAGAAATGATTTTGC<br>ATGTAAGAAAAGATAATTT A--<br>HBV |
| 262 | 10 | 2 | 14 | 2551 | 107 | 131  | 5  | 15736111  | FBXL7          | intron | + |                |         |   |              |        |   |                                                         |
| 263 | 10 | 2 | 14 | 2535 |     |      | 2  | 202829835 | ICA1L          | intron | - |                |         |   |              |        |   | ACTTCTAAGTTTTGCTT--HBV                                  |
| 264 | 10 | 2 | 14 | 2538 |     |      | 8  | 59680145  |                |        |   | TOX            | -560937 | - | CA8          | 508718 | - | CTCCAGCATTTTGAGTA--HBV                                  |
| 265 | 10 | 2 | 14 | 2539 |     |      | 10 | 79033393  | ZMIZ1-<br>AS1  | intron | - |                |         |   |              |        |   | HBV--nnACCGGTTTACATCATTCA                               |
| 266 | 10 | 2 | 14 | 2543 |     |      |    | 0         |                |        |   |                |         |   |              |        |   |                                                         |
| 267 | 10 | 2 | 14 | 2544 |     |      | X  | 80115837  |                |        |   | TBX22          | -84068  | + | CHMP1B2<br>P | 112651 | - | TGATTCTCATTCTCTCT--HBV                                  |
| 268 | 10 | 2 | 14 | 2546 |     |      | 20 | 30421656  |                |        |   | MLLT10P<br>1   | -18194  | - | DEFB115      | 836007 | + | TGCATATGGAATGTCTG--HBV                                  |
| 269 | 10 | 2 | 14 | 2641 | 114 | 51   | 15 | 56886666  | LOC145<br>783  | exon   | - |                |         |   |              |        |   | CATAATATAGCACTTTCT--HBV                                 |
| 270 | 10 | 2 | 14 | 2619 | 111 | 187  | 7  | 27605977  | HIBADH         | intron | - |                |         |   |              |        |   | HBV--CAAACAAGTTATTCATCCCA                               |
| 271 | 10 | 2 | 14 | 2648 | 112 | 187  | 22 | 46582920  |                |        |   | CELSR1         | -45750  | - | GRAMD4       | 43840  | + | HBV--CTTCTCTCTCTTTGTCT                                  |
| 272 | 10 | 2 | 14 | 2639 | 113 | 131  | 4  | 35618971  |                |        |   | >100000        |         |   | ARAP2        | 447026 | - | HBV--<br>nnnnnnnnnnGCCTAAAGCCCTTT<br>GTTC               |
| 273 | 10 | 2 | 14 | 2655 | 110 | 229  | 9  | 113532006 | RGS3           | intron | + |                |         |   |              |        |   | GAGGAGCTGGGTGTC--HBV                                    |
| 274 | 10 | 2 | 14 | 2612 |     |      | 15 | 82533803  |                |        |   | GOLGA6<br>L17P | -7319   | + | RPS17        | 2946   | - | HBV--TCAAGCGATCCTCTGCCT                                 |
| 275 | 10 | 2 | 14 | 2618 |     |      |    | 0         |                |        |   | >100000<br>0   |         |   | CHRM3        | 39525  | + | ATATAGTTTTATGTAATTTCC--HBV                              |
| 276 | 10 | 2 | 14 | 2633 |     |      | 1  | 239589547 |                |        |   |                |         |   |              |        |   | ACTACTTAAACCTTACC--HBV                                  |
| 277 | 10 | 2 | 14 | 2634 |     |      | 13 | 108744898 | MYO16          | intron | + |                |         |   |              |        |   | within 227 nts to right of nt<br>163110338              |
| 278 | 10 | 2 | 14 | 2637 |     |      | 4  | 163110338 |                |        |   | MIR4454        | -16710  | - | NAF1         | 16369  | - | CCTGATGCCT CAGCACCTGCn--<br>HBV                         |
| 279 | 10 | 2 | 14 | 2654 |     |      | 20 | 64198457  | MYT1           | intron | + |                |         |   |              |        |   |                                                         |
| 280 | 10 | 2 | 14 | 2714 | 122 | 77   | 1  | 156213591 | PMF1-<br>BGLAP | intron | + |                |         |   |              |        |   | TCCTGCCGCAGCTTCCCAA--HBV                                |
| 281 | 10 | 2 | 14 | 2710 | 123 | 51   | 1  | 220059053 | BPNT1          | intron | - |                |         |   |              |        |   | TGGATTGTGGTTTTTCTAG--HBV                                |
| 282 | 10 | 2 | 14 | 2739 | 125 | 187  | 11 | 29116520  |                |        |   | MIR8068        | -638972 | - | KCNA4        | 893220 | - | TGCTCTCTACACAGTAAGCAA--<br>HBV                          |
| 283 | 10 | 2 | 14 | 2728 | 120 | 220  | 6  | 78898764  | IRAK1B<br>P1   | exon   | + |                |         |   |              |        |   | HBV--TTGTAAGACAAAATTT                                   |
| 284 | 10 | 2 | 14 | 2731 | 121 | 297  | 9  | 135085520 | OLFM1          | intron | + |                |         |   |              |        |   | HBV--<br>TAAGGATTGGGTGCCAGGCA                           |
| 285 | 10 | 2 | 14 | 2747 | 124 | 642  |    | 0         |                |        |   |                |         |   |              |        |   |                                                         |
| 286 | 10 | 2 | 14 | 2750 | 118 | 622  | 14 | 34499424  |                |        |   | SPTSSA         | -37162  | - | EAPP         | 16504  | - | within 40 nts to right of nt 34499424                   |
| 287 | 10 | 2 | 14 | 2727 | 119 | 938  | 16 | 13012870  | SHISA9         | intron | + |                |         |   |              |        |   | HBV--AACTTCAAAGGGT                                      |
| 288 | 10 | 2 | 14 | 2751 | 126 | 1183 | 7  | 55119726  | EGFR           | intron | + |                |         |   |              |        |   | HBV--AACCCACCTGCCCTGGTT                                 |
| 289 | 10 | 2 | 14 | 2707 |     |      | 6  | 116104675 | NT5DC1         | intron | + |                |         |   |              |        |   | within 73 nts to right of nt<br>116104675               |

|     | A  | B | C  | D    | E   | F    | G  | H         | I             | J         | K | L                | M       | N | O                | P      | Q | R                                                                        |
|-----|----|---|----|------|-----|------|----|-----------|---------------|-----------|---|------------------|---------|---|------------------|--------|---|--------------------------------------------------------------------------|
| 290 | 10 | 2 | 14 | 2715 |     |      | 19 | 1594102   |               |           |   | MBD3             | -1341   | - | UQCR11           | 3052   | - | HBV--<br>CCGGGTTCAAGTAATTCTCTCTG<br>TGGTCAGGGAGCAGCTTTGC--<br>HBV        |
| 291 | 10 | 2 | 14 | 2732 |     |      | 22 | 30891961  | OSBP2         | intron    | + |                  |         |   |                  |        |   | CCTCTTTTGCCCAAGTGGnnn--<br>HBV                                           |
| 292 | 10 | 2 | 14 | 2736 |     |      | 12 | 90641768  |               |           |   | LINC009<br>36    | -929816 | + | LINC0061<br>5    | 276254 | + |                                                                          |
| 293 | 10 | 2 | 14 | 2744 |     |      | 13 | 62942327  |               |           |   | LINC004<br>48    | -134968 |   | LINC0037<br>6    | 240773 | - | HBV--TTAATAATTGAAATTAATAATT                                              |
| 294 | 10 | 2 | 14 | 2749 |     |      | 9  | 24112457  |               |           |   | ELAVL2           | -286392 | - | IZUMO3           | 430757 | - | HBV--AGTGATTCTCTGCCTCA                                                   |
| 295 | 10 | 2 | 14 | 2753 |     |      |    | 0         |               |           |   |                  |         |   |                  |        |   |                                                                          |
| 296 | 11 | 2 | 14 | 3716 | 276 | 69   | 8  | 139110753 |               |           |   | COL22A<br>1      | -196747 | - | KCNK9            | 490084 | - | HBV--<br>TGGCAACATCCTCAGGCACA                                            |
| 297 | 11 | 2 | 14 | 3718 | 277 | 94   | 12 | 84639238  |               |           |   | >100000<br>0     |         |   | SLC6A15          | 220249 | - | HBV--AGTTACTTCATAAATGTTGA                                                |
| 298 | 11 | 2 | 14 | 3712 |     |      | 3  | 93470513  |               |           |   | >100000<br>0     |         |   | PROS1            | 402523 | - | TTTGATGTAATTTTATATTTT--HBV<br>within ~300 nts to right of nt<br>48056784 |
| 299 | 11 | 2 | 14 | 3724 |     |      | 17 | 48056784  | NFE2L1        | uncertain | + |                  |         |   |                  |        |   | within ~650 nts to right of nt<br>56829818                               |
| 300 | 11 | 2 | 14 | 3730 |     |      | 1  | 56829818  |               |           |   | C1orf168         | -10122  | - | C8A              | 24951  | + |                                                                          |
| 301 | 11 | 2 | 14 | 3735 |     |      |    | 0         |               |           |   |                  |         |   |                  |        |   | ACTCCTTCTGCAGGGTGAGTGA--<br>HBV                                          |
| 302 | 11 | 2 | 14 | 3680 | 268 | 34   | 19 | 6696480   | C3            | intron    | - |                  |         |   |                  |        |   |                                                                          |
| 303 | 11 | 2 | 14 | 3678 |     |      |    | 0         |               |           |   |                  |         |   |                  |        |   |                                                                          |
| 304 | 11 | 2 | 14 | 3681 |     |      |    | 0         |               |           |   |                  |         |   |                  |        |   |                                                                          |
| 305 | 11 | 2 | 14 | 3683 |     |      | 21 | 23640805  |               |           |   | D21S208<br>8E    | -255970 | - | LOC1019<br>27869 | 663744 | - | TTTCTTATAATGGTGTATTTAT--<br>HBV                                          |
| 306 | 11 | 2 | 14 | 3702 | 269 | 69   | 10 | 25705185  | LINC008<br>36 | intron    | + |                  |         |   |                  |        |   | HBV--<br>nAGTGGTGAATCTCGGCTCAC                                           |
| 307 | 11 | 2 | 14 | 3695 |     |      |    | 0         |               |           |   |                  |         |   |                  |        |   |                                                                          |
| 308 | 11 | 2 | 14 | 3696 |     |      | 14 | 89211096  | FOXN3         | intron    | - |                  |         |   |                  |        |   | HBV--AGTTTCATTACCTTTCAAC                                                 |
| 309 | 11 | 2 | 14 | 3700 |     |      | 13 | 109021744 | MYO16         | intron    | + |                  |         |   |                  |        |   | within 40 nts to left of nt 109021744                                    |
| 310 | 12 | 2 | 16 | 2581 | 130 | 183  | 3  | 24420709  | THRB          | intron    | - |                  |         |   |                  |        |   | HBV--<br>GGCAAGGTTGCAGAGTAAAGGA                                          |
| 311 | 12 | 2 | 16 | 2597 | 132 | 642  | 2  | 23042543  |               |           |   | LOC1027<br>23362 | -504256 |   | KLHL29           | 342883 | + | AATAACTCTTTATACAGTTAn--HBV<br>GTGCAGCGGAGAGTGACCCAn--<br>HBV             |
| 312 | 12 | 2 | 16 | 2666 | 131 | 1008 | 15 | 35925508  |               |           |   | DPH6-<br>AS1     | -66507  | + | MIR4510          | 1347   | + |                                                                          |
| 313 | 12 | 2 | 16 | 2589 | 129 | 2000 | 6  | 67321866  |               |           |   | >100000<br>0     |         |   | LOC1027<br>23883 | 733484 |   | HBV--nAGGTTAGACTTTTTGGTAC                                                |
| 314 | 12 | 2 | 16 | 2555 | 127 | 1733 |    | 0         |               |           |   |                  |         |   |                  |        |   |                                                                          |
| 315 | 12 | 2 | 16 | 2567 | 128 | 1058 | 5  | 163114132 |               |           |   | GABRG2           | -958593 | + | CCNG1            | 323438 | + | ACAGGCAGAATTTCCAAT--HBV                                                  |
| 316 | 12 | 2 | 16 | 2562 |     |      | 11 | 58955636  | GLYATL<br>1   | exon      | + |                  |         |   |                  |        |   | HBV--CAGCTGGATGTCTCTTATTC                                                |
| 317 | 12 | 2 | 16 | 2570 |     |      |    | 0         |               |           |   |                  |         |   |                  |        |   |                                                                          |
| 318 | 12 | 2 | 16 | 2576 |     |      |    | 0         |               |           |   |                  |         |   |                  |        |   |                                                                          |
| 319 | 12 | 2 | 16 | 2582 |     |      | 3  | 126580557 | TXNRD3<br>NB  | intron    | - |                  |         |   |                  |        |   | TGTGTGGATTCCAATCCCCA--<br>HBV                                            |
| 320 | 12 | 2 | 16 | 2583 |     |      | 5  | 111924181 | NREP          | intron    | - |                  |         |   |                  |        |   | GCTGGGCCTTGGATTTTGAAA--<br>HBV                                           |
| 321 | 12 | 2 | 16 | 2690 | 137 | 187  | 6  | 70563526  |               |           |   | FAM135<br>A      | -2352   | + | SDHAF4           | 3395   | + | CTAGGTTGCTGCAGTTTCATn--<br>HBV                                           |

|     | A  | B | C  | D    | E   | F    | G  | H         | I            | J      | K | L                       | M       | N | O             | P      | Q | R                                                                        |
|-----|----|---|----|------|-----|------|----|-----------|--------------|--------|---|-------------------------|---------|---|---------------|--------|---|--------------------------------------------------------------------------|
| 322 | 12 | 2 | 16 | 2667 | 134 | 342  | 8  | 143235361 |              |        |   | GPIHBP<br>1             | -18191  | + | ZFP41         | 11459  | + | HBV--nGATTACAGGATCACACACA                                                |
| 323 | 12 | 2 | 16 | 2682 | 133 | 723  | 2  | 201601445 | ALS2CR<br>11 | intron | - |                         |         |   |               |        |   | HBV--AGAGAAGAGCAAGATAGAG<br>ATTGATTTCTCATTTCGTTTT--<br>HBV               |
| 324 | 12 | 2 | 16 | 2700 | 135 | 407  | 10 | 105121512 | SORCS3       | intron | + |                         |         |   |               |        |   | within 242 nts to right of nt<br>130938818                               |
| 325 | 12 | 2 | 16 | 2677 |     |      | 3  | 130938818 | ATP2C1       | intron | + |                         |         |   |               |        |   |                                                                          |
| 326 | 12 | 2 | 16 | 2762 | 144 | 187  | 3  | 98942382  |              |        |   | DCBLD2                  | -41056  | - | COL8A1        | 696213 | + | within 40 nts to right of nt 98942382<br>HBV--                           |
| 327 | 12 | 2 | 16 | 2797 | 140 | 297  | 1  | 167529560 |              |        |   | CD247                   | -10950  | - | CREG1         | 11453  | - | nnAGTTGTATTAGCTTTCTATTGC                                                 |
| 328 | 12 | 2 | 16 | 2764 | 141 | 643  | 19 | 45585702  |              |        |   | OPA3                    | -838    | - | GPR4          | 4062   | - | TCAGAAATAAATTTAAGGAC--HBV<br>CTATGAAACCTGTGAATTTnnnnnn<br>nnn--HBV       |
| 329 | 12 | 2 | 16 | 2803 | 142 | 1008 | 6  | 135385661 | AHI1         | intron | - |                         |         |   |               |        |   |                                                                          |
| 330 | 12 | 2 | 16 | 2759 | 138 | 4023 | 9  | 98882830  |              |        |   | GALNT1<br>2             | -32749  | + | COL15A1       | 60882  | + | TTTCTTTCCCTGTCTTTTC--HBV<br>ATGCCACTTACTAGGTGGACAAA--<br>HBV             |
| 331 | 12 | 2 | 16 | 2802 | 139 | 1733 | 18 | 70984299  |              |        |   | GTSCR1                  | -333442 | - | LINC0154<br>1 | 535664 | - | HBV--<br>TCTTGCTCACGAGAGTCCTCCC<br>CATCTGTTGGCTCTTGAGAAAn--<br>HBV       |
| 332 | 12 | 2 | 16 | 2809 | 143 | 5596 | 1  | 41476045  |              |        |   | SCMH1                   | -233902 | - | EDN2          | 2279   | - |                                                                          |
| 333 | 12 | 2 | 16 | 2765 |     |      | 2  | 97732650  | ZAP70        | intron | + |                         |         |   |               |        |   |                                                                          |
| 334 | 12 | 2 | 16 | 2768 |     |      |    | 0         |              |        |   |                         |         |   |               |        |   |                                                                          |
| 335 | 12 | 2 | 16 | 2771 |     |      |    | 0         |              |        |   |                         |         |   |               |        |   |                                                                          |
| 336 | 12 | 2 | 16 | 2792 |     |      |    | 0         |              |        |   |                         |         |   |               |        |   |                                                                          |
| 337 | 12 | 2 | 16 | 2810 |     |      | 2  | 37547391  |              |        |   | QPCT                    | -174564 | + | CDC42EP<br>3  | 94490  | - | HBV--<br>TCGTGGGGTGACAAAGGGG                                             |
| 338 | 13 | 2 | 17 | 1959 | 36  | 340  | X  | 15162293  |              |        |   | MOSPD2                  | -240956 | + | ASB9          | 81693  | - | CCAATAAGCTAGATTCATTnn--HBV                                               |
| 339 | 13 | 2 | 17 | 1921 | 34  | 907  | 14 | 106076891 |              |        |   | ADAM6                   | -104622 | - | LINC0022<br>6 | 210782 | + | HBV--ATAAAATGTATATGCA<br>HBV--<br>CTCTGAAAGTGCTGGGATTA                   |
| 340 | 13 | 2 | 17 | 1955 | 36  | 1456 | 22 | 30596440  | PES1         | intron | - |                         |         |   |               |        |   |                                                                          |
| 341 | 13 | 2 | 17 | 1953 | 35  | 2000 | 3  | 194843049 |              |        |   | LOC1005<br>07391        | -60881  | + | XXYL1         | 225234 | - | CTGTAATCCCAGCACTTT--HBV<br>approx. HBV--<br>nCCAGAGTGAAGCAGACATACTG<br>T |
| 342 | 13 | 2 | 17 | 1918 |     |      | 2  | 218668259 | RNF25        | exon   | - |                         |         |   |               |        |   |                                                                          |
| 343 | 13 | 2 | 17 | 1922 |     |      | 6  | 151518831 | CCDC17<br>0  | intron | + |                         |         |   |               |        |   | GCAGGTTTTTATTAAGGACT--HBV<br>within 272 nts to right of nt<br>11034381   |
| 344 | 13 | 2 | 17 | 1925 |     |      | 19 | 11034381  | SMARC<br>A4  | intron | + |                         |         |   |               |        |   |                                                                          |
| 345 | 13 | 2 | 17 | 1926 |     |      | 18 | 7331602   |              |        |   | LRRRC30<br>>100000<br>0 | -99558  | + | PTPRM         | 236216 | + | HBV--nTCTGCCTCCCGGGTTCA                                                  |
| 346 | 13 | 2 | 17 | 1927 |     |      | X  | 63317858  |              |        |   |                         |         |   | SPIN4         | 29369  | - | within 270 nts to left of nt 63317858<br>~ATGTACTACTGAGGCCGTA--<br>HBV   |
| 347 | 13 | 2 | 17 | 1928 |     |      | X  | 154096037 | MECP2        | intron | - |                         |         |   |               |        |   |                                                                          |
| 348 | 13 | 2 | 17 | 1930 |     |      | 8  | 104886603 |              |        |   | LRP12                   | -297579 | - | ZFPM2         | 432315 | + | AAATCCTCTCTTTAGC--HBV                                                    |
| 349 | 13 | 2 | 17 | 1940 |     |      | 10 | 42917286  |              |        |   | BMS1                    | -82349  | + | LINC0126<br>4 | 61730  | - | HBV--AAAAAATTGAAAACAGC                                                   |
| 350 | 13 | 2 | 17 | 1943 |     |      | 1  | 56570009  | PPAP2B       | intron | - |                         |         |   |               |        |   | HBV--CTTATATAGTGTGTGCA                                                   |

|     | A  | B | C  | D    | E  | F    | G  | H         | I            | J                       | K | L               | M       | N | O            | P      | Q | R                                                           |
|-----|----|---|----|------|----|------|----|-----------|--------------|-------------------------|---|-----------------|---------|---|--------------|--------|---|-------------------------------------------------------------|
| 351 | 13 | 2 | 17 | 1952 |    |      | 22 | 45236843  | KIAA0930     | intron                  | - |                 |         |   |              |        |   | CCCCTTCTCTGCACCA--HBV<br>AGACCCTTCAGGGACTGCCT--<br>21n--HBV |
| 352 | 13 | 2 | 17 | 1966 |    |      | 11 | 122647359 |              |                         |   | MIR100HG        | -444297 | - | UBASH3B      | 8330   | + |                                                             |
| 353 | 13 | 2 | 17 | 1887 | 39 | 938  | 1  | 4160502   |              |                         |   | LINC01346       | -207919 | + | LOC284661    | 251548 | + | ~GTCATGTCTACCCTCTGCAGGG<br>T--HBV                           |
| 354 | 13 | 2 | 17 | 1880 | 40 | 1456 | 16 | 33963253  |              |                         |   | ENPP7P13        | -178978 |   | LINC00273    | 195331 | - | CCCTTGCCCTCTTGGCGC--HBV                                     |
| 355 | 13 | 2 | 17 | 1895 | 38 | 907  | 12 | 14259231  |              |                         |   | GRIN2B          | -279143 | - | ATF7IP       | 106400 | + | AGGATAACAGTAATAACCGCnn--<br>HBV                             |
| 356 | 13 | 2 | 17 | 1874 | 37 | 7967 | 19 | 44757015  | BCL3         | at intron-exon junction | + |                 |         |   |              |        |   | HBV--AGACACCGCTCCACCTGG                                     |
| 357 | 13 | 2 | 17 | 1866 |    |      | 7  | 144526314 | TPK1         | intron                  | - |                 |         |   |              |        |   | HBV--TGAAAAAGATTTTGTGATAG                                   |
| 358 | 13 | 2 | 17 | 1875 |    |      | 5  | 89178690  |              |                         |   | MEF2C-AS1       | -146314 | + | LINC01339    | 979648 |   | HBV--<br>GGGCAGAGAAATGTGATATG                               |
| 359 | 13 | 2 | 17 | 1876 |    |      | 15 | 36350632  |              |                         |   | MIR4510SERPINB8 | -423709 | + | C15orf41     | 228970 | + | within 95 nts to left of nt 36350632                        |
| 360 | 13 | 2 | 17 | 1907 |    |      | 18 | 64044086  |              |                         |   |                 | -54712  | + | LINC00305    | 35922  | - | HBV--GGTTTGTCTTTCACTGT                                      |
| 361 | 13 | 2 | 17 | 1914 |    |      |    | 0         |              |                         |   |                 |         |   |              |        |   |                                                             |
| 362 | 13 | 2 | 17 | 1790 | 28 | 187  | 20 | 2333235   | TGM3         | intron                  | + |                 |         |   |              |        |   | TTCTGTCTCCAGAGAAACTGnnnn<br>nnnnnnnnn--HBV                  |
| 363 | 13 | 2 | 17 | 1777 | 25 | 152  |    | 0         |              |                         |   |                 |         |   |              |        |   |                                                             |
| 364 | 13 | 2 | 17 | 1786 | 27 | 182  | 21 | 8218570   | LOC100507412 | intron                  | + |                 |         |   |              |        |   | GGATTATGACTGAACGCCTC--<br>HBV                               |
| 365 | 13 | 2 | 17 | 1792 | 26 | 327  | 16 | 49022236  |              |                         |   | N4BP1           | -412027 | - | CBLN1        | 255681 | - | GCGGGATTGGGGTCCCTC--HBV                                     |
| 366 | 13 | 2 | 17 | 1780 |    |      |    | 0         |              |                         |   |                 |         |   |              |        |   |                                                             |
| 367 | 13 | 2 | 17 | 1787 |    |      | 9  | 13895619  |              |                         |   | LINC01235       | -464290 | - | LINC00583    | 32351  | + | HBV--<br>nnnAGCAAGTCACAAAAATTC                              |
| 368 | 13 | 2 | 17 | 1795 |    |      | 9  | 5896764   | MLANA        | intron                  | + |                 |         |   |              |        |   | CTTTGTGGTAACTGTAAT--HBV                                     |
| 369 | 13 | 2 | 17 | 1798 |    |      | 20 | 60862076  |              |                         |   | MIR548AG2       | -297451 | + | LOC100506470 | 216987 | + | HBV--nnGATGCTGATTCAGTT                                      |
| 370 | 13 | 2 | 17 | 1800 |    |      | 22 | 46675898  | GRAMD4       | intron                  | + |                 |         |   |              |        |   | GCCCCTGCCTCGGATGC--HBV                                      |
| 371 | 13 | 2 | 17 | 1806 |    |      |    | 0         |              |                         |   |                 |         |   |              |        |   |                                                             |
| 372 | 13 | 2 | 17 | 1814 |    |      | 3  | 56852545  | ARHGEF3      | intron                  | - |                 |         |   |              |        |   | HBV--TGTTTTTTCAAATTCTCTA                                    |
| 373 | 14 | 2 | 19 | 1120 | 11 | 616  | 5  | 166605125 |              |                         |   | >1000000        |         |   | CTB-7E3.1    | 300096 | - | HBV--ATAGCCTTATCCTGTGCTT                                    |
| 374 | 14 | 2 | 19 | 1122 | 10 | 1149 |    | 0         |              |                         |   |                 |         |   |              |        |   |                                                             |
| 375 | 14 | 2 | 19 | 1090 | 8  | 5163 | 18 | 6873174   | ARHGA P28    | intron                  | + |                 |         |   |              |        |   | within 144 nts to right of 6873174                          |
| 376 | 14 | 2 | 19 | 1114 | 9  | 4450 | 20 | 45127011  |              |                         |   | WFDC12          | -2546   | - | PI3          | 47887  | + | AATATCTCTTTGGGATCCTG--HBV                                   |
| 377 | 14 | 2 | 19 | 1106 |    |      |    | 0         |              |                         |   |                 |         |   |              |        |   |                                                             |
| 378 | 14 | 2 | 19 | 1107 |    |      | 10 | 94808237  | CYP2C19      | intron                  | + |                 |         |   |              |        |   | HBV--GGCCAGTATAATGT                                         |
| 379 | 14 | 2 | 19 | 1126 |    |      |    | 0         |              |                         |   |                 |         |   |              |        |   |                                                             |
| 380 | 14 | 2 | 19 | 1408 | 15 | 1674 | 6  | 18042875  |              |                         |   | KIF13A          | -55252  | - | NHLRC1       | 77611  | - | HBV--GAAGACCCCTCCGCTGC                                      |

|     | A  | B | C  | D    | E   | F    | G  | H         | I      | J      | K | L                | M       | N | O              | P      | Q | R                                           |
|-----|----|---|----|------|-----|------|----|-----------|--------|--------|---|------------------|---------|---|----------------|--------|---|---------------------------------------------|
| 381 | 14 | 2 | 19 | 1407 |     |      | 8  | 30152539  |        |        |   | MBOAT4           | -7855   | - | DCTN6          | 3757   | + | HBV--<br>nnnGCACGTGCCACCATGCCTCG<br>C       |
| 382 | 14 | 2 | 19 | 1416 |     |      | 2  | 210601408 | CPS1   | intron | + |                  |         |   |                |        |   | within 102 nts to right of nt<br>210601408  |
| 383 | 14 | 2 | 19 | 1421 |     |      | 5  | 165964705 |        |        |   |                  |         |   | CTB-<br>7E3.1  | 940516 | - | within 40 nts to right of nt<br>165964705   |
| 384 | 14 | 2 | 19 | 1426 |     |      | 12 | 98467233  |        |        |   | SLC9A7<br>P1     | -10088  | - | LOC6437<br>70  | 18310  | - | TAAAATTTCTTTCAG--HBV                        |
| 385 | 14 | 2 | 19 | 1149 | 13  | 1078 | 2  | 191820569 |        |        |   | NABP1            | -132047 | + | SDPR           | 13736  | - | TAACATTTTACAGAGCCC--HBV                     |
| 386 | 14 | 2 | 19 | 1152 | 13  | 1078 | 3  | 117825136 |        |        |   | LINC009<br>01    | -892898 |   | >1000000       |        |   | HBV--TGTTAGTGCATCATTTTT                     |
| 387 | 14 | 2 | 19 | 1133 | 12  | 1272 |    | 0         |        |        |   |                  |         |   |                |        |   |                                             |
| 388 | 14 | 2 | 19 | 1129 |     |      | 4  | 82746892  | SCD5   | intron | - |                  |         |   |                |        |   | within 150 nts to right of nt<br>82746892   |
| 389 | 14 | 2 | 19 | 1131 |     |      | 11 | 115683192 |        |        |   | CADM1            | -178669 | - | LINC0090<br>0  | 72140  | - | within 175 nts to left of nt 115683192      |
| 390 | 14 | 2 | 19 | 1141 |     |      |    | 0         |        |        |   |                  |         |   |                |        |   |                                             |
| 391 | 14 | 2 | 19 | 1156 |     |      | 2  | 162841092 |        |        |   | KCNH7            | -2345   | - | FIGN           | 768459 | - | within 150 nts to right of nt<br>162841092  |
| 392 | 15 | 2 | 23 | 4037 | 257 | 151  | 9  | 133881250 | VAV2   | intron | - |                  |         |   |                |        |   | CACAGAGAGATGCGGCCn--HBV                     |
| 393 | 15 | 2 | 23 | 4006 | 255 | 238  | 15 | 48030022  |        |        |   | SEMA6D           | -255799 | + | SLC24A5        | 90949  | + | TTTCAACTCTTCTGCTGCn<br>nnn--HBV             |
| 394 | 15 | 2 | 23 | 4026 | 257 | 282  |    | 0         |        |        |   |                  |         |   |                |        |   |                                             |
| 395 | 15 | 2 | 23 | 4005 | 256 | 1149 | 7  | 55452043  |        |        |   | LANCL2           | -18301  | + | VOPP1          | 18564  | - | HBV--TACCAATAGTAGGAC                        |
| 396 | 15 | 2 | 23 | 3986 | 254 | 587  | 4  | 48345308  | SLAIN2 | intron | + |                  |         |   |                |        |   | HBV--CAGAGTAAATAATCCCAGTT                   |
| 397 | 15 | 2 | 23 | 3997 |     |      | 11 | 46715331  |        |        |   | ZNF408           | -9370   | + | F2             | 3861   | + | HBV--CCCAGCTATTTGGGAG                       |
| 398 | 15 | 2 | 23 | 4007 |     |      | 3  | 156586391 |        |        |   | SSR3             | -31191  | - | TIPARP-<br>AS1 | 86779  | - | HBV--<br>GTTTAGGCTTGGCCTCATCACA             |
| 399 | 15 | 2 | 23 | 4021 |     |      | 1  | 56978586  |        |        |   | C8B              | -12446  | - | DAB1           | 19319  | - | within 40 nts to left of nt 56978586        |
| 400 | 15 | 2 | 23 | 4029 |     |      | 1  | 47331883  |        |        |   | STIL             | -17736  | - | CMPK1          | 1913   | + | within 450 nts to left of nt 47331883       |
| 401 | 15 | 2 | 23 | 4030 |     |      | 14 | 103885822 |        |        |   | LINC006<br>37    | -27773  | + | C14orf2        | 26465  | - | HBV--CCTAGCCCCTACCTTCTC                     |
| 402 | 15 | 2 | 23 | 4032 |     |      | 4  | 180692756 |        |        |   | >100000<br>0     |         |   | LINC0029<br>0  | 371333 | - | within 1200 nts to left of nt<br>180692756  |
| 403 | 15 | 2 | 23 | 4035 |     |      | 10 | 36055897  |        |        |   | PCAT5            | -254977 | + | >1000000       |        |   | HBV--GTCCATTCTTCTCATC                       |
| 404 | 15 | 2 | 23 | 4038 |     |      | 1  | 238589902 |        |        |   | LOC1001<br>30331 | -661583 | + | >1000000       |        |   | within ~750 nts to right of nt<br>238589902 |
| 405 | 15 | 2 | 23 | 4065 | 259 | 282  | 3  | 106417444 |        |        |   | CBLB             | -548401 | - | LINC0088<br>2  | 692345 | - | HBV--<br>TGTAACAACATAAAGACGCA               |
| 406 | 15 | 2 | 23 | 4094 | 262 | 277  | 7  | 46572890  |        |        |   | IGFBP3           | -651618 | - | TNS3           | 702263 | - | HBV--ACCCTGTGAATTATGGTGC                    |
| 407 | 15 | 2 | 23 | 4069 | 264 | 433  | 18 | 35238602  |        |        |   | MAPRE2           | -95134  | + | ZNF397         | 2427   | + | within 162 nts to left of nt 35238602       |
| 408 | 15 | 2 | 23 | 4070 | 258 | 1949 | 5  | 143874163 |        |        |   | HMHB1            | -53444  | + | YIPF5          | 288054 | + | HBV--<br>ATAAATCTTGCTGAAGGAAAC              |
| 409 | 15 | 2 | 23 | 4102 | 260 | 635  |    | 0         |        |        |   |                  |         |   |                |        |   |                                             |
| 410 | 15 | 2 | 23 | 4087 | 261 | 1149 | 12 | 115153653 |        |        |   | TBX3             | -469489 | - | MED13L         | 804922 | - | within 150 nts to left of nt 115153653      |
| 411 | 15 | 2 | 23 | 4096 | 263 | 5500 | 3  | 41060244  |        |        |   | ZNF621           | -520449 | + | CTNNB1         | 139208 | - | TTGAAGATCAGCTGACTGTAG--<br>HBV              |
| 412 | 15 | 2 | 23 | 4080 |     |      | 14 | 50308450  | L2HGDH | intron | - |                  |         |   |                |        |   | HBV--<br>ATACACAGATGGCAAAGAAGCAC            |

|     | A  | B | C  | D    | E   | F    | G  | H         | I        | J      | K | L            | M       | N | O        | P      | Q | R                                         |
|-----|----|---|----|------|-----|------|----|-----------|----------|--------|---|--------------|---------|---|----------|--------|---|-------------------------------------------|
| 413 | 15 | 2 | 23 | 4082 |     |      | 7  | 74481611  | GTF2IRD1 | intron | + |              |         |   |          |        |   | within 40 nts to left of nt 74481611      |
| 414 | 15 | 2 | 23 | 4086 |     |      |    | 0         |          |        |   |              |         |   |          |        |   |                                           |
| 415 | 15 | 2 | 23 | 4098 |     |      | 2  | 217439396 | DIRC3    | intron | - |              |         |   |          |        |   | ACAACAACGCAGTGAGATAAA--HBV                |
| 416 | 15 | 2 | 23 | 4101 |     |      | 19 | 13956220  | DCAF15   | exon   | + |              |         |   |          |        |   | within 40 nts to left of nt 13956220 HBV- |
| 417 | 15 | 2 | 23 | 4158 | 266 | 2000 | 4  | 71601151  |          |        |   | SLC4A4       | -29064  | + | GC       | 140542 | - | TTTAAATTAACAGTTTTAGGCA                    |
| 418 | 15 | 2 | 23 | 4183 | 267 | 2743 | 3  | 187060777 | ST6GAL1  | intron | + |              |         |   |          |        |   | TTGGCAGCTAGAAGTTGAAATT--HBV               |
| 419 | 15 | 2 | 23 | 4152 | 265 | 5999 | 10 | 95731408  | ENTPD1   | intron | + |              |         |   |          |        |   | TGTAGCCGACCCTCTG--HBV                     |
| 420 | 15 | 2 | 23 | 4162 |     |      | 2  | 118067070 |          |        |   | CCDC93       | -52907  | - | INSIG2   | 21403  | + | within 75 nts to left of nt 118067070     |
| 421 | 15 | 2 | 23 | 4182 |     |      | X  | 122468185 |          |        |   | >1000000     |         |   | GRIA3    | 716057 | + | TGTTTTCCGATAGATnnnn--HBV                  |
| 422 | 15 | 2 | 23 | 4184 |     |      | 4  | 99313535  | ADH1B    | intron | - |              |         |   |          |        |   | ATTTTTAACTAAAAATTAATAA                    |
| 423 | 15 | 2 | 23 | 4185 |     |      | 8  | 62536589  | NKAIN3   | intron | + |              |         |   |          |        |   | CTGTGGGGACACATCTAGn--HBV                  |
| 424 | 15 | 2 | 23 | 4186 |     |      | 1  | 235916277 |          |        |   | LYST         | -32569  | - | NID1     | 59554  | - | TCAACCTCTGGAATTTTGA--HBV                  |
| 425 | 15 | 2 | 23 | 4189 |     |      | 1  | 77621722  | ZZZ3     | intron | - |              |         |   |          |        |   | HBV--CAGGAGGATTTCTGTGCC                   |
| 426 | 16 | 2 | 25 | 1327 | 22  | 74   | 8  | 81218770  |          |        |   | PAG1         | -106702 | - | FABP5    | 61712  | + | ACACCTGGCTAACTTTTTAT--HBV                 |
| 427 | 16 | 2 | 25 | 1294 | 18  | 92   | 14 | 67211985  | FAM71D   | intron | + |              |         |   |          |        |   | HBV--GCATTCTTCTGCCAGGAGA                  |
| 428 | 16 | 2 | 25 | 1293 | 19  | 104  | 10 | 91904675  |          |        |   | TNKS2        | -39200  | + | FGFBP3   | 1912   | - | HBV--CAGTGCAAAATATTTCTG                   |
| 429 | 16 | 2 | 25 | 1307 | 21  | 187  | 16 | 67667074  | C16orf86 | intron | + |              |         |   |          |        |   | CGCTCAGACCTCCGAGGTn--HBV                  |
| 430 | 16 | 2 | 25 | 1336 | 20  | 297  | 2  | 123807565 |          |        |   | >1000000     |         |   | CNTNAP5  | 217721 | + | GACACACAGAGCTATGTGG--HBV                  |
| 431 | 16 | 2 | 25 | 1295 | 17  | 322  | 8  | 27291710  | TRIM35   | intron | - |              |         |   |          |        |   | HBV-nnnnnATAACAATAGTTTATTT                |
| 432 | 16 | 2 | 25 | 1297 |     |      | 22 | 2083373   |          |        |   | >1000000     |         |   | >1000000 |        |   | CAAGAGCAAGACTCTACCTCAAnn                  |
| 433 | 16 | 2 | 25 | 1299 |     |      | 19 | 33855613  |          |        |   | KCTD15       | -39852  | + | LSM14A   | 316833 | + | within 68 nts to left of nt 33855613      |
| 434 | 16 | 2 | 25 | 1319 |     |      | 17 | 51215233  | MBTD1    | intron | - |              |         |   |          |        |   | TAATCATGTG GTAAGGTTAGn--HBV               |
| 435 | 16 | 2 | 25 | 1322 |     |      | 13 | 24214004  | SPATA1   | intron | + |              |         |   |          |        |   | HBV--ATATGTTGGTTTCAGA                     |
| 436 | 16 | 2 | 25 | 1342 |     |      | 4  | 120612857 |          |        |   | MAD2L1       | -546123 | - | PRDM5    | 79055  | - | within 40 nts to right of nt 120612857    |
| 437 | 16 | 2 | 25 | 1447 | 16  | 87   | 4  | 19740344  |          |        |   | >1000000     |         |   | SLIT2    | 513219 | + | AACAGTATCTCCATTT--HBV                     |
| 438 | 16 | 2 | 25 | 1428 |     |      | 6  | 105969056 |          |        |   | PREP         | -565932 | - | PRDM1    | 117263 | + | TTGTTAATTGCACCACTTC--HBV                  |
| 439 | 16 | 2 | 25 | 1430 |     |      | 15 | 88988718  |          |        |   | MFGE8        | -75286  | - | ABHD2    | 99431  | + | AGGGGAATTGCAATAGAGAAA--HBV                |
| 440 | 16 | 2 | 25 | 1431 |     |      | 7  | 84719888  |          |        |   | LOC101927378 | -145045 | + | SEMA3D   | 275667 | - | within 19nts to left of nt 84719888       |
| 441 | 16 | 2 | 25 | 1435 |     |      | 13 | 99366339  | UBAC2    | intron | + |              |         |   |          |        |   | HBV--GTTTTGAATTTGAGTTTTTCCCCA             |

|     | A  | B | C  | D    | E   | F    | G  | H         | I            | J      | K | L         | M       | N | O         | P      | Q | R                                            |
|-----|----|---|----|------|-----|------|----|-----------|--------------|--------|---|-----------|---------|---|-----------|--------|---|----------------------------------------------|
| 442 | 16 | 2 | 25 | 1441 |     |      | 11 | 59932181  |              |        |   | TCN1      | -65613  | - | OOSP1     | 10697  | + | within 40 nts to right of nt 59932181        |
| 443 | 16 | 2 | 25 | 1449 |     |      | 3  | 114575127 | ZBTB20       | intron | - |           |         |   |           |        |   | CAGAAGTAGGACTAGAACT--HBV                     |
| 444 | 16 | 2 | 25 | 1452 |     |      | 15 | 68279727  | FEM1B        | intron | + |           |         |   |           |        |   | HBV--ATTCTTTTTTAGGTTTAAACA                   |
| 445 | 16 | 2 | 25 | 1684 | 23  | 51   | X  | 83326924  |              |        |   | >1000000  |         |   | POU3F4    | 181336 | + | GCATGGGAGAACTGAGTTAGC--HBV                   |
| 446 | 16 | 2 | 25 | 1670 | 24  | 74   | 11 | 8636670   | TRIM66       | intron | - |           |         |   |           |        |   | TCTGATATCTCTTGAATCTTTn--HBV                  |
| 447 | 16 | 2 | 25 | 1679 | 24  | 32   | 13 | 111000244 |              |        |   | ANKRD1    | -85137  | - | ARHGEF7   | 115282 | + | AGCTGNGAAGTCATGCAGCnnnnnnnnnnnnnnnnnnnn--HBV |
| 448 | 16 | 2 | 25 | 1662 |     |      | 4  | 166433955 |              |        |   | TLL1      | -329498 | + | SPOCK3    | 299429 | - | AATTAAACTACATGCATTT--HBV                     |
| 449 | 16 | 2 | 25 | 1664 |     |      |    | 0         |              |        |   |           |         |   |           |        |   |                                              |
| 450 | 16 | 2 | 25 | 1671 |     |      | 17 | 76492339  | RHBDF2       | intron | - |           |         |   |           |        |   | TGGAGACAGCATAACCCAG--HBV                     |
| 451 | 16 | 2 | 25 | 1672 |     |      | 17 | 51221932  | MBTD1        | intron | - |           |         |   |           |        |   | TTACAAATCTATGAGAAATCAnnnnnn--HBV             |
| 452 | 16 | 2 | 25 | 1675 |     |      |    | 0         |              |        |   |           |         |   |           |        |   |                                              |
| 453 | 16 | 2 | 25 | 1689 |     |      | 9  | 75945996  | PCSK5        | intron | + |           |         |   |           |        |   | TGTTGATTTGGTGACTGTT--HBV                     |
| 454 | 16 | 2 | 25 | 1691 |     |      | 1  | 33546240  | CSMD2        | intron | - |           |         |   |           |        |   | HBV--AATCCCATATTTTCAGGGA                     |
| 455 | 16 | 2 | 25 | 1696 |     |      | 6  | 85461810  | NT5E         | intron | + |           |         |   |           |        |   | HBV--AGGCCTGGCACCCTCTCTCT                    |
| 456 | 16 | 2 | 25 | 1700 |     |      |    | 0         |              |        |   |           |         |   |           |        |   |                                              |
| 457 | 17 | 2 | 25 | 4133 | 251 | 23   | 3  | 30662750  | TGFBR2       | intron | + |           |         |   |           |        |   | CTAGAAAATTATCATGGGC--HBV                     |
| 458 | 17 | 2 | 25 | 4106 | 249 | 39   | X  | 121427083 |              |        |   | MIR3672   | -56030  |   | >1000000  |        |   | GTATTATTAGAACCATTATn--HBV                    |
| 459 | 17 | 2 | 25 | 4119 | 250 | 18   | 1  | 15673431  |              |        |   | RSC1A1    | -11709  | + | PLEKHM2   | 10900  | + | TGTTGGCTGTTGTTTCTGC--HBV                     |
| 460 | 17 | 2 | 25 | 4123 | 248 | 3105 | 10 | 83077447  |              |        |   | NRG3      | -90268  | + | >1000000  |        |   | TTAGGAATTCTAGCAGAACAnnnnnn--HBV              |
| 461 | 17 | 2 | 25 | 4134 |     |      | 17 | 53822748  |              |        |   | C17orf11  | -835096 | + | KIF2B     | 129    | + | TTTCTCGCATGATCCGGA--HBV                      |
| 462 | 17 | 2 | 25 | 4136 |     |      | 3  | 107279636 | LINC0083     | intron | + |           |         |   |           |        |   | CAAACAATTTGAAACAGC--HBV                      |
| 463 | 17 | 2 | 25 | 4195 | 252 | 286  | 8  | 29637026  |              |        |   | DUSP4     | -286748 | - | LINC00589 | 84233  | - | ATGGCTAACATGGTGAAACnn--HBV                   |
| 464 | 17 | 2 | 25 | 4194 |     |      | 1  | 22316535  |              |        |   | MIR4418   | -50235  | + | ZBTB40    | 135315 | + | CCCTTAGGTCCTCACAn--HBV                       |
| 465 | 17 | 2 | 25 | 4200 |     |      | 3  | 48634649  | SLC26A6      | intron | - |           |         |   |           |        |   | HBV--nnAGCTTTCACCAGTCAGGAA                   |
| 466 | 17 | 2 | 25 | 4149 |     |      | 13 | 43863539  | CCDC12       | intron | - |           |         |   |           |        |   | HBV--AAGAAAGTATAAAGTGT                       |
| 467 | 17 | 2 | 25 | 4150 |     |      | 8  | 34897319  |              |        |   | LINC01288 | -32521  | + | UNC5D     | 338137 | + | CTAGAATTTGGAACTATCT--HBV                     |
| 468 | 17 | 2 | 25 | 4151 |     |      | 2  | 65831213  |              |        |   | SPRED2    | -398691 | - | MIR4778   | 527035 | - | within 40 nts to right of nt 65831213        |
| 469 | 18 | 2 | 28 | 2154 |     |      | 4  | 99208221  | LOC100507053 | intron | - |           |         |   |           |        |   | HBV--nAGATTTTTAAGTAACTCC                     |
| 470 | 18 | 2 | 28 | 2157 |     |      | 3  | 228861    | CHL1         | intron | + |           |         |   |           |        |   | TAATGGTGGA<br>TTTGACCnnnnnnnnn--HBV          |

|     | A  | B | C  | D    | E   | F    | G  | H         | I      | J      | K | L                | M       | N | O                | P      | Q | R                                                                       |
|-----|----|---|----|------|-----|------|----|-----------|--------|--------|---|------------------|---------|---|------------------|--------|---|-------------------------------------------------------------------------|
| 471 | 18 | 2 | 28 | 2237 | 102 | 561  | 6  | 144643887 | UTRN   | intron | + |                  |         |   |                  |        |   | HBV--<br>nnnnnnnnTTTTTAAAATTGCTTTA                                      |
| 472 | 18 | 2 | 28 | 2232 | 101 | 1628 | 1  | 152152524 |        |        |   | TCHH             | -37070  | - | RPTN             | 1070   | - | HBV--TCAATAGTCCNNGG                                                     |
| 473 | 18 | 2 | 28 | 2235 | 103 | 1976 | 7  | 132456666 | PLXNA4 | intron | - |                  |         |   |                  |        |   | HBV--CCCAGGATGGGCCAGG                                                   |
| 474 | 18 | 2 | 28 | 2233 |     |      |    | 0         |        |        |   |                  |         |   |                  |        |   |                                                                         |
| 475 | 18 | 2 | 28 | 2322 | 100 | 780  | 14 | 30602427  | G2E3   | intron | + |                  |         |   |                  |        |   | TAATTATTTTTTTGTGTACT--HBV                                               |
| 476 | 19 | 2 | 29 | 2901 | 152 | 187  | 12 | 5179216   |        |        |   | KCNA5            | -133227 | + | LOC1019<br>29584 | 54779  | - | CCATCCTAGACTGTCCTGn--HBV                                                |
| 477 | 19 | 2 | 29 | 2916 | 151 | 295  | 5  | 180023238 | RNF130 | intron | - |                  |         |   |                  |        |   | HBV--<br>nTATGTAGATATGCAGGAGTTA                                         |
| 478 | 19 | 2 | 29 | 2902 | 149 | 652  | 17 | 13949850  |        |        |   | HS3ST3<br>A1     | -348721 | - | CDRT15P<br>1     | 74647  | + | HBV--<br>nnnCATTGAACCTCCCTGTG                                           |
| 479 | 19 | 2 | 29 | 2909 | 150 | 923  | 4  | 141492489 |        |        |   | LOC1005<br>07639 | -159872 |   | IL15             | 144106 | + | HBV--AGTCATTCCTGTTCCA<br>AACAGGGAGCATATGGCCTGT--<br>HBV                 |
| 480 | 19 | 2 | 29 | 2904 |     |      | 1  | 6882297   | CAMTA1 | intron | + |                  |         |   |                  |        |   |                                                                         |
| 481 | 19 | 2 | 29 | 2906 |     |      | 15 | 45445807  |        |        |   | C15orf48         | -12358  | + | SLC30A4          | 36673  | - | within 40 nts to left of nt 45445807<br>AGCATATTCATCCTGGCTGGCn--<br>HBV |
| 482 | 19 | 2 | 29 | 2910 |     |      | 13 | 100363997 | PCCA   | intron | + |                  |         |   |                  |        |   |                                                                         |
| 483 | 19 | 2 | 29 | 2911 |     |      | 11 | 134107675 | JAM3   | intron | + |                  |         |   |                  |        |   | within 168 nts to right of nt<br>134107675                              |
| 484 | 19 | 2 | 29 | 2919 |     |      | 3  | 71405086  | FOXP1  | intron | - |                  |         |   |                  |        |   | CTTCCAAATTTCCACACA--HBV                                                 |
| 485 | 20 | 3 | 23 | 1242 | 33  | 77   | 19 | 5695130   | LONP1  | intron | - |                  |         |   |                  |        |   | HBV--<br>nnnnnATGGTATCTTAGATGCCGCT                                      |
| 486 | 20 | 3 | 23 | 1259 | 14  | 5895 | 14 | 25412634  |        |        |   | STXBP6           | -362337 | - | >1000000         |        |   | HBV--<br>AGTACGGCCGACTCCAGTAGGGA                                        |
| 487 | 20 | 3 | 23 | 1252 |     |      | 2  | 209661342 | MAP2   | intron | + |                  |         |   |                  |        |   | HBV--<br>nnTCCACACCAACCCCAAG                                            |
| 488 | 20 | 3 | 23 | 1261 |     |      | 4  | 188076224 |        |        |   | ZFP42            | -71175  | + | TRIML2           | 15047  | - | HBV--<br>CAACTCTCCTGCCTCAGCCT                                           |
| 489 | 20 | 3 | 23 | 1274 |     |      | 7  | 2634434   | TTYH3  | intron | + |                  |         |   |                  |        |   | CTGCCTCCCTGGTGAGGAGTT<br>GC--HBV                                        |
| 490 | 20 | 3 | 23 | 1282 |     |      | 20 | 7007038   |        |        |   | BMP2             | -226775 | + | LINC0142<br>8    | 139428 | - | within 130 nts to right of nt to right of<br>7007038                    |
| 491 | 20 | 3 | 23 | 1652 | 47  | 561  | 4  | 104040223 |        |        |   | TACR3            | -320407 | - | CXXC4            | 428082 | - | CTCAGCCCCAAATCTCCTTA--HBV                                               |
| 492 | 20 | 3 | 23 | 1635 | 49  | 1008 | 8  | 142522537 | ADGRB1 | intron | + |                  |         |   |                  |        |   | TCTGTTGGGGGCTTCAG--HBV                                                  |
| 493 | 20 | 3 | 23 | 1657 | 48  | 1171 | 3  | 71755312  |        |        |   | GPR27            | -135    | + | PROK2            | 16342  | - | HBV--<br>nGATTGTACTGACTCCTTTGGG                                         |
| 494 | 20 | 3 | 23 | 1643 | 43  | 878  | 14 | 74508971  | LTBP2  | intron | - |                  |         |   |                  |        |   | HBV--<br>GAGGAAGACAGCCGATGGC                                            |
| 495 | 20 | 3 | 23 | 1637 | 45  | 2682 | 3  | 160892148 | PPM1L  | intron | + |                  |         |   |                  |        |   | CGGAACCTAAAATAAAATAA--<br>HBV                                           |
| 496 | 20 | 3 | 23 | 1610 | 42  | 5162 | 1  | 24169532  | IFNLR1 | exon   | - |                  |         |   |                  |        |   | HBV--<br>nnnnCATAGAACATAGCAGCTCCT<br>T                                  |
| 497 | 20 | 3 | 23 | 1626 |     |      |    | 0         |        |        |   |                  |         |   |                  |        |   |                                                                         |
| 498 | 20 | 3 | 23 | 1639 |     |      | 2  | 43087375  |        |        |   | LOC1027<br>23854 | -47832  | - | ZFP36L2          | 136943 | - | HBV--<br>nCCCAGAAGATTCCTGGATCC                                          |





|     | A  | B | C  | D    | E   | F     | G  | H         | I             | J      | K | L            | M       | N | O             | P      | Q | R                                        |
|-----|----|---|----|------|-----|-------|----|-----------|---------------|--------|---|--------------|---------|---|---------------|--------|---|------------------------------------------|
| 530 | 22 | 3 | 26 | 1550 | 60  | 194   | X  | 112390159 | ZCCHC1<br>6   | intron | + |              |         |   |               |        |   | HBV--<br>ATTTAGGATCGTGGCCAGGTG           |
| 531 | 22 | 3 | 26 | 1571 | 61  | 642   |    | 0         |               |        |   |              |         |   |               |        |   |                                          |
| 532 | 22 | 3 | 26 | 1566 | 58  | 2062  | 1  | 152568994 |               |        |   | LCE3E        | -2241   | - | LCE3D         | 10389  | - | HBV--TTTTTTTTCTTTAGCACTTTG               |
| 533 | 22 | 3 | 26 | 1536 | 57  | 4011  | 13 | 86522191  |               |        |   | SLITRK6      | -722843 | - | MIR4500<br>HG | 921795 | - | HBV--<br>CCAGTCAGAACAGCTGGATATTA         |
| 534 | 22 | 3 | 26 | 1581 | 59  | 3580  | 13 | 84077248  |               |        |   | SLITRK1      | -195741 | - | LINC0033<br>3 | 63353  | + | HBV--CTTCCCAGAGGATAAAAAGG                |
| 535 | 22 | 3 | 26 | 1541 |     |       |    | 0         |               |        |   |              |         |   |               |        |   |                                          |
| 536 | 22 | 3 | 26 | 1572 |     |       | 9  | 133971570 | VAV2          | intron | - |              |         |   |               |        |   | HBV--<br>GTGACACTGGCCTCTGCCAG            |
| 537 | 22 | 3 | 26 | 1590 |     |       | 4  | 88503047  | HERC5         | intron | + |              |         |   |               |        |   | HBV--<br>GTTTTCTGTTTCTATTTAT             |
| 538 | 22 | 3 | 26 | 1591 |     |       | 9  | 130611406 | FUBP3         | intron | + |              |         |   |               |        |   | TGCCTGATTTGGGGAGA--HBV                   |
| 539 | 22 | 3 | 26 | 1596 |     |       | 6  | 47571362  | CD2AP         | intron | + |              |         |   |               |        |   | CAAAAAGTAGACTGCACAGG--<br>HBV            |
| 540 | 22 | 3 | 26 | 1604 |     |       | 1  | 179363185 |               |        |   | SOAT1        | -4506   | + | AXDND1        | 2534   | + | HBV--<br>nnnnnnnnAGGAAAATAAGAAAAA<br>AAG |
| 541 | 23 | 3 | 26 | 1996 | 80  | 74    | 21 | 21342520  | NCAM2         | intron | + |              |         |   |               |        |   | AGCCTCTCCAGTATGGCTnnnnnn<br>nnnn--HBV    |
| 542 | 23 | 3 | 26 | 1970 | 79  | 2120  | 9  | 16239116  | C9orf92       | intron | - |              |         |   |               |        |   | HBV--<br>AACCTGGTGGGAAGTAATTGA           |
| 543 | 23 | 3 | 26 | 1983 |     |       | 10 | 58643783  | BICC1         | intron | + |              |         |   |               |        |   | within 10 nts to right of nt 58643783    |
| 544 | 23 | 3 | 26 | 1990 |     |       | 5  | 136506566 |               |        |   | TRPC7        | -141090 | - | SPOCK1        | 468731 | - | HBV--<br>nnnGGCTAGGGACCTGGAGTCTG         |
| 545 | 23 | 3 | 26 | 2056 | 83  | 399   | 18 | 38531347  |               |        |   | MIR4318      | -874132 | + | LINC0066<br>9 | 675576 | - | CATACCCTCTCACCTCCCA--<br>HBV             |
| 546 | 23 | 3 | 26 | 2016 | 83  | 652   | 2  | 134257821 | MGAT5         | intron | + |              |         |   |               |        |   | HBV--<br>nnnnnATTAGTTTGCAGTCTCTTT<br>T   |
| 547 | 23 | 3 | 26 | 2044 | 84  | 1008  | 20 | 50917312  | ADNP          | intron | - |              |         |   |               |        |   | HBV--CAAGTCAGTCAGATGATT                  |
| 548 | 23 | 3 | 26 | 2023 | 81  | 1241  | 7  | 112447138 | IFRD1         | intron | + |              |         |   |               |        |   | HBV--TGAATCAAAGTCATCAAT                  |
| 549 | 23 | 3 | 26 | 2012 | 82  | 36781 | 1  | 147668340 | ACP6          | intron | - |              |         |   |               |        |   | TCAACCATAAAGGCAGAAG--HBV                 |
| 550 | 23 | 3 | 26 | 2032 |     |       | 9  | 100084919 | ERP44         | intron | - |              |         |   |               |        |   | HBV--AAAAAGCTAAGGCAACA                   |
| 551 | 23 | 3 | 26 | 2033 |     |       | 7  | 148773668 | CUL1          | intron | + |              |         |   |               |        |   | CGCTGCGTGTCTTCTC--HBV                    |
| 552 | 23 | 3 | 26 | 2037 |     |       |    | 0         |               |        |   |              |         |   |               |        |   |                                          |
| 553 | 23 | 3 | 26 | 2041 |     |       | 21 | 29369825  |               |        |   | BACH1<br>IT2 | -7929   | + | BACH1-<br>IT2 | 2675   | + | TTCTCAGGCCTGGGTCC--HBV                   |
| 554 | 23 | 3 | 26 | 2055 |     |       | 1  | 17703791  | ARHGEF<br>10L |        |   |              | -5916   | + | ACTL8         | 51521  | + | HBV--<br>GCAGTGGTGCGAACCCGGC             |
| 555 | 23 | 3 | 26 | 2064 | 86  | 2000  | 17 | 54406378  |               |        |   | KIF2B        | -581166 | + | TOM1L1        | 494312 | + | AAAGATTAATAGTGGTGATT--HBV                |
| 556 | 23 | 3 | 26 | 2088 |     |       | 6  | 6255684   | F13A1         | intron | - |              |         |   |               |        |   | AGTGGCAAAGCATGATn--HBV                   |
| 557 | 23 | 3 | 26 | 2093 |     |       | 17 | 9077838   | NTN1          | intron | + |              |         |   |               |        |   | HBV--GACCGGTGTTCAATGAAT                  |
| 558 | 23 | 3 | 26 | 2096 |     |       | 12 | 91829905  |               |        |   | DCN          | -646876 | - | C12orf79      | 155070 | - | TGCCCACTTTGGCCTCC--HBV                   |
| 559 | 24 | 3 | 26 | 2413 | 104 | 18469 |    | 0         |               |        |   |              |         |   |               |        |   |                                          |
| 560 | 24 | 3 | 26 | 2445 |     |       | 10 | 89427337  |               |        |   | IFIT5        | -6335   | + | SLC16A1<br>2  | 2956   | - | ~TCCCTTGTGT GAACAGTTc--<br>HBV           |
| 561 | 24 | 3 | 26 | 2470 | 105 | 157   | 8  | 138771194 | COL22A<br>1   | intron | - |              |         |   |               |        |   | HBV--<br>nnnnCTCCCTGCACCTCACCAGG         |
| 562 | 24 | 3 | 26 | 2483 | 106 | 337   | 17 | 43882099  | MPP2          | intron | - |              |         |   |               |        |   | within 40 nts to right of nt 43882099    |

|     | A  | B | C  | D    | E   | F     | G  | H         | I             | J      | K | L                      | M            | N | O                           | P      | Q | R                                                                           |
|-----|----|---|----|------|-----|-------|----|-----------|---------------|--------|---|------------------------|--------------|---|-----------------------------|--------|---|-----------------------------------------------------------------------------|
| 563 | 24 | 3 | 26 | 2485 |     |       | 6  | 97144652  | MMS22L        | intron | - |                        |              |   |                             |        |   | ATTTAGGGAAAGTGGCTATnnn--<br>HBV                                             |
| 564 | 24 | 3 | 26 | 2490 |     |       |    | 0         |               |        |   |                        |              |   |                             |        |   |                                                                             |
| 565 | 25 | 3 | 27 | 2530 | 145 | 25    | 3  | 76457907  |               |        |   | ZNF717                 | -672324      | - | ROBO2                       | 582235 | + | GGTTGGGGCGACTGGGACACAG--<br>HBV                                             |
| 566 | 25 | 3 | 27 | 2836 | 148 | 57    | 9  | 37277108  | ZCCHC7        | intron | + |                        |              |   |                             |        |   | CCAAGTATAGACTCATT--HBV<br>HBV-<br>nnnnnnnnGTAGCTGGGATTACAGG<br>CATGT        |
| 567 | 25 | 3 | 27 | 2849 | 147 | 1733  | X  | 134523203 |               |        |   | HPRT1                  | -22535       | + | MIR450B<br>LOC1019<br>27701 | 16981  | - | GATAGAGATATAAAATTCTG--HBV                                                   |
| 568 | 25 | 3 | 27 | 2847 | 146 | 4320  | 2  | 67602716  |               |        |   | ETAA1                  | -192315      | + |                             | 193337 | - | HBV--nAAAAGGACCTAGATA                                                       |
| 569 | 25 | 3 | 27 | 2818 |     |       | X  | 3084718   | ARSF          | intron | + |                        |              |   |                             |        |   | HBV--AAATATTTTTCCCTGGGA                                                     |
| 570 | 26 | 3 | 29 | 1530 | 69  | 340   | X  | 31805791  | DMD           | intron | - |                        |              |   |                             |        |   |                                                                             |
| 571 | 26 | 3 | 29 | 1497 | 64  | 643   | 20 | 12456031  |               |        |   | BTBD3                  | -529436      | + | LOC1019<br>29486            | 409172 | - | TAAAGTGTCTAATTCA--HBV<br>HBV--<br>TGTTGGCTGACAAATTATTTT                     |
| 572 | 26 | 3 | 29 | 1503 | 66  | 1008  | 13 | 102146298 | FGF14         | intron | - |                        |              |   |                             |        |   | GAACACTTGTTTTCATCAT--HBV<br>HBV--<br>CCTCTGCAATCCTCAGGGATA                  |
| 573 | 26 | 3 | 29 | 1469 | 62  | 2670  | 5  | 151860329 | GLRA1         | intron | - |                        |              |   |                             |        |   | ACAGAGAGGAAGGGACCTnn--<br>HBV                                               |
| 574 | 26 | 3 | 29 | 1495 | 65  | 2062  | 1  | 31238043  | NKAIN1        | intron | - |                        |              |   |                             |        |   |                                                                             |
| 575 | 26 | 3 | 29 | 1486 |     |       | 19 | 48962442  |               |        |   | BAX<br>LINC015<br>26   | -644         | + | FTL                         | 2866   | + | HBV--ACCACACACGGTCAAACAA                                                    |
| 576 | 26 | 3 | 29 | 1516 |     |       | 6  | 81890783  |               |        |   |                        | -76591       | - | IBTK                        | 279455 | - |                                                                             |
| 577 | 26 | 3 | 29 | 1523 |     |       |    | 0         |               |        |   |                        |              |   |                             |        |   |                                                                             |
| 578 | 26 | 3 | 29 | 1525 |     |       | 6  | 103795610 |               |        |   |                        | >100000<br>0 |   | HACE1                       | 932482 | - | HBV--<br>AAAGAAAAAAAACCCCTATGG                                              |
| 579 | 26 | 3 | 29 | 1533 |     |       | 12 | 29009007  |               |        |   | CCDC91<br>MIR548A<br>1 | -458841      | + | FAR2<br>LOC1019<br>28519    | 139995 | + | GAACCTGTGATTCTATT--HBV                                                      |
| 580 | 26 | 3 | 29 | 1828 | 78  | 1008  | 6  | 18822120  |               |        |   | ATXN1                  | -250240      | + | STMND1                      | 246422 | + | ATCACTAATAGGTAATCTATT--HBV<br>TGCCATGCTGGGTTTCA--HBV                        |
| 581 | 26 | 3 | 29 | 1823 | 76  | 1624  | 6  | 17025890  |               |        |   |                        | -264400      | - |                             | 76367  | + | HBV--AAAATTCAAACTTGAACT                                                     |
| 582 | 26 | 3 | 29 | 1835 | 71  | 3032  | X  | 44242614  | EFHC2         | intron | - |                        |              |   |                             |        |   | HBV--AAGAAATCACATTAAGTGT                                                    |
| 583 | 26 | 3 | 29 | 1855 | 72  | 2536  | 1  | 19390206  | CAPZB         | intron | - |                        |              |   |                             |        |   | GTGCCTTTGGATAATTTTAGTCC--<br>HBV<br>HBV--<br>nnGACTGTGTCTATCATTGGGTTG<br>GT |
| 584 | 26 | 3 | 29 | 1821 | 70  | 8389  | 17 | 55013573  | STXBP4        | intron | + |                        |              |   |                             |        |   |                                                                             |
| 585 | 26 | 3 | 29 | 1833 | 154 | 10501 | 7  | 156783566 | LMBR1         | intron | - |                        |              |   |                             |        |   | TAGCCATTTTATAGGTTAAA--HBV<br>CTTTCTACTCGATGGGTGCCAA--<br>HBV                |
| 586 | 26 | 3 | 29 | 1853 | 74  | 24258 | 2  | 209999103 | UNC80         | exon   | + |                        |              |   | SERPINB<br>5                | 9169   | + | AGATTTACCATTTTAATAAACATG--<br>HBV                                           |
| 587 | 26 | 3 | 29 | 1861 | 73  | 12438 | 18 | 63467741  |               |        |   | VPS4B                  | -45222       | - |                             |        |   | HBV--ATTATTGTGTATTTTCAGA<br>HBV--<br>TATATGCAATGATGATAATAAT                 |
| 588 | 26 | 3 | 29 | 1830 |     |       | 8  | 117071845 | SLC30A<br>8   | intron | + |                        |              |   |                             |        |   |                                                                             |
| 589 | 26 | 3 | 29 | 1854 |     |       | 11 | 106701739 | GUCY1A<br>2   | intron | - |                        |              |   |                             |        |   |                                                                             |
| 590 | 26 | 3 | 29 | 2964 | 156 | 5713  | 2  | 62405869  |               |        |   | B3GNT2                 | -181138      | + | TMEM17<br>RBMY1A3<br>P      | 94351  | - | GTCAGTTCTCACCCCT--HBV                                                       |
| 591 | 26 | 3 | 29 | 2968 | 155 | 12556 | Y  | 8834727   |               |        |   | TTY11                  | -17345       | - |                             | 482333 | - | HBV--AGCTACCATTAGACCCAGC                                                    |
| 592 | 26 | 3 | 29 | 2939 | 153 | 56293 | 8  | 31564713  |               |        |   | WRN                    | -391611      | + | NRG1                        | 75038  | + |                                                                             |
| 593 | 26 | 3 | 29 | 2945 |     |       |    | 0         |               |        |   |                        |              |   |                             |        |   |                                                                             |
| 594 | 26 | 3 | 29 | 2973 |     |       | 4  | 100034797 | LOC256<br>880 | intron |   |                        |              |   |                             |        |   | TGTACAATAGTCAGGGATGT--HBV                                                   |

|     | A                                                                                                                                                                                                                                                                                                                                                                                                                                                                                                                                                                                                                                                                                                                                                                                                                         | B | C | D | E | F | G | H | I | J | K | L | M | N | O | P | Q | R |
|-----|---------------------------------------------------------------------------------------------------------------------------------------------------------------------------------------------------------------------------------------------------------------------------------------------------------------------------------------------------------------------------------------------------------------------------------------------------------------------------------------------------------------------------------------------------------------------------------------------------------------------------------------------------------------------------------------------------------------------------------------------------------------------------------------------------------------------------|---|---|---|---|---|---|---|---|---|---|---|---|---|---|---|---|---|
| 595 | <p>*Integration sites are listed by patient age within each patient group (IT, gp1; HBeAg(+) IA, gp2; HBeAg(-), gp3). A "0" in the insert site location means that we were unable to locate a unique integration site based on the cell sequence at the virus/cell junction. A string of n's at the virus/cell junction means that the indicated number of bases differed between the consensus human DNA sequence (GRCh38) and the observed sequence. For instance, HBV--nnGACTGTGTCTATCATTGGGTTGGT means that two bases at the virus/cell junction aligned neither with published HBV sequences nor the human sequence GRCh38. For integrations that did not map to either introns or exons, we determined the distance to the nearest genes to the left or right of the integration (within 1,000,000 base pairs).</p> |   |   |   |   |   |   |   |   |   |   |   |   |   |   |   |   |   |
